1 **A systems biology-based identification and *in vivo* functional**  
2 **screening of Alzheimer’s disease risk genes reveals**  
3 **modulators of memory function**  
4  
5

6 Adam D. Hudgins<sup>1\*</sup>, Shiyi Zhou<sup>2\*</sup>, Rachel N. Arey<sup>2‡</sup>, Coleen T. Murphy<sup>2,3#</sup>, Yousin Suh<sup>1,4#</sup>  
7  
8

9 <sup>1</sup>Department of Obstetrics and Gynecology, Columbia University Irving Medical Center, New  
10 York, NY, USA

11 <sup>2</sup>Department of Molecular Biology, Princeton University, Princeton, NJ, USA

12 <sup>3</sup>LSI Genomics, Princeton University, Princeton, NJ, USA

13 <sup>4</sup>Department of Genetics and Development, Columbia University Irving Medical Center, New  
14 York, NY, USA  
15

16  
17 \*These authors contributed equally to this work

18 ‡Current Address:

19 Department of Molecular and Cellular Biology, Baylor College of Medicine, Houston, TX, USA  
20  
21  
22  
23  
24  
25

26 #Corresponding authors:

27 Dr. Coleen T. Murphy

28 Department of Molecular Biology

29 LSI Genomics

30 Princeton University

31 Princeton, NJ 08544

32 Email: [ctmurphy@princeton.edu](mailto:ctmurphy@princeton.edu)  
33

34 Dr. Yousin Suh

35 Department of Obstetrics and Gynecology

36 Department of Genetics and Development

37 Columbia University Irving Medical Center

38 630 W. 168<sup>th</sup> St., New York, NY 10032

39 Tel : 212-305-6832

40 Email: [ys3214@cumc.columbia.edu](mailto:ys3214@cumc.columbia.edu)  
41

## 42 **Summary**

43 Genome-wide association studies (GWAS) have uncovered over 40 genomic loci associated  
44 with risk for late-onset Alzheimer's Disease (LOAD), but identification of the underlying causal  
45 genes remains challenging. While the role of glial biology in the mediation of LOAD genetic risk  
46 has been increasingly recognized, recent studies of induced pluripotent stem cell (iPSC)-derived  
47 neurons from LOAD patients have demonstrated the existence of neuronal cell-intrinsic  
48 functional defects, absent interactions with other brain cell types or exposure to neurotoxic  
49 insults. Here, we searched for genetic contributions to neuronal dysfunction in LOAD  
50 pathobiology, using an integrative systems approach that incorporated multi-evidence-based  
51 gene-mapping and network analysis-based prioritization. We found widespread dysfunction in  
52 neuronal gene co-expression networks in the LOAD brain and identified synaptic and  
53 endolysosomal function as being specifically impacted by LOAD-associated genetic variation. A  
54 systematic perturbation screening of candidate risk genes in *C. elegans* revealed that neuronal  
55 knockdown of the LOAD risk gene orthologs *vha-10* (*ATP6V1G2*), *cmd-1* (*CALM3*), *amph-1*  
56 (*BIN1*), *ephx-1* (*NGEF*), and *pho-5* (*ACP2*) significantly alters short/intermediate-term memory  
57 function, the cognitive domain affected earliest during LOAD progression. These results  
58 highlight the impact of LOAD risk genes on evolutionarily conserved memory function, as  
59 mediated through neuronal endosomal dysfunction, and identify new targets for further  
60 mechanistic interrogation.

61

## 62 **Introduction**

63 Alzheimer's Disease (AD), the most common cause of dementia, is an age-related  
64 neurodegenerative disorder that affects millions worldwide<sup>1</sup>. Although our understanding of the  
65 molecular mechanisms underpinning the progression of AD has increased steadily over the past

66 several decades<sup>2,3</sup>, the precise etiology of the disease remains elusive, and no preventative or  
67 curative treatments currently exist<sup>3,4</sup>. In recent years, large consortia-based genome-wide  
68 association studies (GWAS) have identified over 40 genomic loci associated with risk for  
69 sporadic late-onset AD (LOAD)<sup>5-8</sup>, the predominant form (>90% of cases) of the disease.  
70 However, the majority of risk variants reside in non-coding regions of the genome and are  
71 enriched in cell type-specific transcriptional regulatory elements such as enhancers, suggesting  
72 that they contribute to genetic risk by altering gene expression regulatory networks<sup>9,10</sup>. Yet, we  
73 still have a limited ability to predict how non-coding variants affect cell- and tissue-specific gene  
74 regulatory interactions that alter transcriptional outputs, confounding efforts to identify LOAD-  
75 causal variants and target genes<sup>10-12</sup>, a critical step to fully realize the promise of GWAS for  
76 clinical applications.

77         Thus far, the genes and loci implicated in LOAD genetic risk have nominated multiple  
78 pathways for disease relevance, including endosomal trafficking, cholesterol regulation,  
79 mitochondrial function, and inflammation and immunity<sup>13</sup>, most of which are active in multiple  
80 cell types in the brain. Due to the discovery of LOAD-associated coding variation in genes such  
81 as *TREM2*<sup>14-16</sup>, *PLCG2*<sup>14,17</sup>, and *ABI3*<sup>14</sup>, which are predominantly expressed in microglia,  
82 functional studies in both cell and animal models have increasingly been focused on the role of  
83 microglial biology with regard to genetic risk for LOAD and the pathways listed above<sup>18-22</sup>.  
84 However, in contrast to previous work which had highlighted the importance of microglia-  
85 expressed genes to transcriptional network dysregulation in the LOAD brain<sup>23</sup>, a recent co-  
86 expression network study of brain RNA-seq data from a large-scale LOAD cohort found neuron-  
87 specific co-expression modules to be the most profoundly affected by disease state<sup>24</sup>.  
88 Additionally, *in vitro* studies of neuronal cultures derived from LOAD patient iPSCs have  
89 demonstrated several cell-intrinsic defects in neuronal function, including hyperexcitability and  
90 altered synapse formation dynamics, absent interactions with other cell types or exposure to

91 external neurotoxic insults<sup>25,26</sup>. The precise mechanisms through which common genetic  
92 variation contributes to neuronal cellular dysfunction and genetic risk for LOAD are understudied  
93 and remain largely unknown.

94 Here, we searched for genetic contributions to neuronal dysfunction in LOAD  
95 pathobiology by taking a systems biology approach. We analyzed summary statistics data from  
96 a recent LOAD GWAS meta-analysis<sup>7</sup> in the context of large-scale brain omics data, utilizing 1)  
97 multi-evidence-based gene-mapping; 2) transcriptome-wide correlation with clinical and  
98 neuropathological traits and network analysis-based prioritization; and 3) *in vivo* functional  
99 screening to identify high-confidence neuronal genes and pathways contributing to LOAD  
100 pathophysiology. We found that many candidate LOAD risk genes that are dysregulated in the  
101 LOAD brain and more strongly correlated with clinically-assessed cognitive function and  
102 dementia severity than with post-mortem assessment of neuropathological burden are central  
103 members of network modules involved in critical neuronal functions.

104 As modeling cognitive dysfunction *in vitro* presents considerable challenges, we chose  
105 to screen our candidate genes for LOAD-relevant effects *in vivo*, through the use of *C. elegans*  
106 associative memory assays, a well-established experimental paradigm of cognitive function  
107 assessment with evolutionarily conserved molecular underpinnings<sup>27-29</sup>. *C. elegans* shares  
108 similarities with mammals in age-related physiological changes, including learning and memory  
109 decline<sup>28</sup>. Like mammals, memory loss is one of the earliest features of neuronal aging in *C.*  
110 *elegans*<sup>28,30</sup>. Furthermore, conserved molecular machinery is required in *C. elegans* to learn and  
111 remember<sup>27,28,31</sup>. A systematic perturbation screening of candidate risk genes in *C. elegans*  
112 revealed that neuronal knockdown of the LOAD risk gene orthologs *vha-10* (*ATP6V1G2*), *cmd-1*  
113 (*CALM3*), *amph-1* (*BIN1*), *ephx-1* (*NGEF*), and *pho-5* (*ACP2*) significantly altered  
114 short/intermediate-term memory function, the cognitive domain affected earliest during LOAD

115 progression, highlighting these genes for further *in vitro* and *in vivo* evaluation as potential  
116 therapeutic targets.

117

## 118 **Results**

### 119 **Integrative multi-omics analysis for target gene identification and functional screening *in*** 120 ***vivo***

121 To identify high-confidence target genes that underlie LOAD genetic risk and contribute to  
122 neuronal dysfunction in LOAD pathobiology, we analyzed LOAD GWAS summary statistics<sup>7</sup> in  
123 the context of large-scale brain omics data, as outlined in **Fig. 1**. Our analysis framework  
124 incorporates data from large-scale brain expression quantitative trait loci (eQTL) studies  
125 (PsychENCODE<sup>32</sup>, CommonMind Consortium (CMC)<sup>33</sup>, BRAINEAC<sup>34</sup>, BrainSeq<sup>35</sup>, ROSMAP<sup>36</sup>,  
126 and GTEx<sup>37</sup>), chromatin interaction data from various Hi-C analyses of brain and neural tissue  
127 (PsychENCODE - Dorsolateral Prefrontal Cortex (DLPFC)<sup>32</sup>, Giusti- Rodríguez et al.- Adult and  
128 Fetal Cortex<sup>38</sup>, and Schmitt et al. - DLPFC, Hippocampus, and Neural Progenitor Cell<sup>39</sup>), and  
129 RNA-seq data from a cohort of 364 brains from the Mount Sinai Brain Bank (MSBB)<sup>40</sup>, a  
130 recently generated resource made publicly available as part of the Accelerating Medicines  
131 Partnership-Alzheimer’s Disease Consortium (AMP-AD). A key strength of our approach is the  
132 use of the *C. elegans* short/intermediate-term associative memory assay as an organismal level  
133 readout of the relevance of our prioritized candidate genes to neuronal circuit integrity and  
134 function.

135

### 136 **LOAD GWAS variants are enriched in neuronal open chromatin regions**

137 Previous studies have shown that LOAD SNP heritability is specifically enriched in  
138 transcriptional regulatory elements active in microglia<sup>41-44</sup>, findings which have contributed to the  
139 recent focus on microglial biology in LOAD functional genomics studies. While clearly important  
140 to genetic risk for LOAD, this microglial enrichment does not explain the dysfunctional  
141 phenotypes observed in LOAD patient iPSC-derived neurons<sup>25,26</sup>. To test for the presence of  
142 LOAD GWAS signal<sup>7</sup> in neuronal transcriptional regulatory elements, we used single-cell open  
143 chromatin profiles generated from the human brain by Assay for Transposase-Accessible  
144 Chromatin using sequencing (scATAC-seq)<sup>43</sup>, and a statistical enrichment methodology  
145 employed by Wang and colleagues<sup>45</sup> (see Methods). We found an enrichment of LOAD GWAS  
146 signal in the open chromatin of several neuronal cell types, over a wide range of statistical  
147 significance, from genome-wide significant (GWS) p-values ( $P < 5 \times 10^{-8}$ ) to a sub-GWS p-value of  
148  $P = 1 \times 10^{-4}$ , although the overall neuronal enrichment observed was much weaker than that seen  
149 in microglia (**Fig. 2a**).

150 Since any enrichment of signal in the sub-GWS range could potentially be explained by  
151 linkage disequilibrium (LD) with above-threshold LOAD GWAS variants<sup>9</sup>, we performed an  
152 additional enrichment analysis after removing all variants within 1 Mb of the GWS loci.  
153 Surprisingly, the enrichment of sub-GWS signal in neuronal open chromatin regions was  
154 significantly strengthened, a result observed for all neuronal subtypes in the scATAC-seq  
155 dataset, including both excitatory and inhibitory neurons (**Fig. 2a**). In comparison, the same  
156 analysis using scATAC-seq data from the human lung<sup>46</sup> did not show enrichment in the open  
157 chromatin of lung cell types (**Supplemental Fig. 1a**). This result indicates that sub-threshold  
158 LOAD GWAS loci likely harbor causal non-coding risk variants in transcriptional regulatory  
159 elements active in neurons, which may lead to the dysregulation of causal risk genes underlying  
160 the dysfunction observed in LOAD patient iPSC-derived neurons. Thus, for our integrative  
161 approach outlined in **Fig. 1** we chose to include loci which reached a suggestive significance

162 threshold of  $P < 1 \times 10^{-5}$ , in addition to GWS loci, as this approach has been successfully used for  
163 post-GWAS gene mapping<sup>45,47-49</sup>.

164

### 165 **eQTL and chromatin interaction data indicate potential causal genes in LOAD GWAS loci**

166 Increasing evidence suggests that the gene nearest to the most significant variant in a GWAS  
167 loci is often not the causal gene<sup>50-53</sup>. To identify and prioritize candidate causal LOAD risk  
168 genes, we incorporated functional genomics data with summary statistics from the recent LOAD  
169 GWAS meta-analysis conducted by Jansen and colleagues<sup>7</sup> using the web-based platform  
170 Functional Mapping and Annotation (FUMA)<sup>54</sup> (see Methods). We selected genes which were  
171 nominated by eQTL<sup>32-37</sup> or chromatin interaction data<sup>32,38,39</sup> (**Fig. 1**) and disregarded genes that  
172 were only implicated through positional mapping. These datasets expand upon those used for  
173 gene-mapping in the original Jansen et al. study<sup>7</sup>, incorporating two more eQTL studies  
174 (PsychENCODE<sup>32</sup> and BrainSeq<sup>35</sup>), and two additional Hi-C studies (PsychENCODE<sup>32</sup> and  
175 Giusti- Rodríguez et al.- Adult and Fetal cortex<sup>38</sup>). In addition, we included those genes that  
176 contained protein-coding variants in LD ( $r^2 > 0.8$ ) with the tag variant at each LOAD GWAS  
177 locus. This strategy nominated 1,630 coding and non-coding genes, in 29 GWS and 71 sub-  
178 GWS loci, as candidate causal LOAD risk genes (**Fig 2c, Supplemental Table 1**). The majority  
179 of mapped genes were protein-coding, with lncRNAs and pseudogenes making up the next two  
180 largest categories, in roughly equal proportions in both GWS and sub-GWS loci (**Fig. 2c**).

181 More candidate risk genes were mapped by variant-promoter chromatin interactions  
182 ( $n=1,353$ ) than by eQTL evidence ( $n=542$ ). In total, 282 genes (17%) were supported by both  
183 eQTL and chromatin interaction evidence (**Fig. 2b**). The PsychENCODE and the Adult and  
184 Fetal cortex Hi-C data provided most of the chromatin interaction-implicated genes  
185 (**Supplemental Fig. 2a, Supplemental Table 2**), and the majority of cis-eQTL-associated

186 genes came from the PsychENCODE, GTEx, and CMC datasets (**Supplemental Fig. 2b,**  
187 **Supplemental Table 3**). Using human single-cell transcriptome data from the temporal  
188 cortex<sup>32,55,56</sup>, we examined the expression patterns of the protein-coding candidates (n=957) and  
189 found ubiquitous expression across cell types for many genes, but higher levels of expression  
190 for most of the risk genes in neurons and astrocytes, in comparison to that of microglia,  
191 oligodendrocytes, oligodendrocyte precursors, and endothelial cells (**Fig. 2d**).

192 Of particular interest is the *CELF1/SPI1* locus (11p11.2), which did not reach GWS in the  
193 Jansen et al. study<sup>7</sup> but has been found as GWS in several previous LOAD GWAS<sup>5,6,8</sup> (**Fig. 2e**).  
194 Previous work has implicated *SPI1* as the causal gene in the locus<sup>57</sup> based on the data from  
195 microglia. However, whether or not *SPI1* is the only causal gene in the locus, and microglia are  
196 the only causal cell type, remains unclear. Overlaying the locus with recently generated brain  
197 cell type-specific epigenomic annotation data<sup>42</sup>, we found that the region of LOAD association is  
198 rich with regulatory elements that are active in several cell types, including dense clusters of  
199 neuronal enhancers (**Fig. 2e**). Our integrated analysis including eQTL and chromatin interaction  
200 data implicates almost all (n=29) of the protein-coding genes in the *CELF1/SPI1* locus as  
201 candidate causal LOAD risk genes (**Fig. 2e**), highlighting the challenges in identifying the true  
202 causal genes and relevant cell types underlying GWAS associations and the need for further  
203 prioritization and functional screening.

204

## 205 **Prioritized LOAD risk genes are co-expression network hubs dysregulated in the LOAD** 206 **brain.**

207 To determine the potential relevance of our candidate risk genes to the transcriptional  
208 alterations occurring in the LOAD brain, we performed weighted gene co-expression network  
209 analysis (WGCNA)<sup>58</sup> on RNA-seq data from a cohort of 364 brains from the Mount Sinai Brain



210 Bank (MSBB)<sup>40</sup>. Samples from this cohort span a wide spectrum of LOAD-related  
211 neuropathological and cognitive disease severities; and RNA-seq data exists for 4 brain regions:  
212 Brodmann area 10 (BM10) frontal pole, BM22 superior temporal gyrus, BM36 parahippocampal  
213 gyrus, and BM44 inferior frontal gyrus. We focused our analyses on data from the BM36 region  
214 (n=215) because a prior transcriptomic study of this cohort found that BM36, out of 19 sampled  
215 regions, was the most highly affected by AD<sup>59</sup>. Using WGCNA we identified 32 distinct co-  
216 expression modules, 10 of which were enriched for cell type-specific gene expression  
217 signatures: oligodendrocyte (M1, M22); neuronal (M2, M10, M25, M32); astrocyte (M23);  
218 endothelial (M14, M18); microglia (M28); astrocyte/endothelial (M20); and microglia/endothelial  
219 (M21) (**Fig. 3a**).

220 We utilized the spectrum of neuropathology and cognitive function present across the  
221 dataset to identify significant associations between gene expression and disease severity. We  
222 assessed the correlations between both the expression of individual genes, and the expression  
223 of module eigengenes, and neuropathological category (CERAD), neurofibrillary tangle burden  
224 (Braak), and clinically-assessed cognitive function (CDR), as well as *APOE* genotype. On the  
225 level of individual genes, 14,421 genes were associated with at least one trait (FDR<0.05,  
226 **Supplemental Table 4**), indicating large-scale rewiring of transcriptional activity in the LOAD  
227 brain, with a large overlap seen between genes that were significantly correlated with CDR  
228 score, CERAD neuropathological category, and Braak staging score (**Fig. 3b**). In contrast,  
229 *APOE* genotype was significantly associated with relatively few genes (**Fig. 3b**). With regard to  
230 module-trait correlations, we found that 26 of the 32 modules were significantly associated with  
231 at least one trait (**Fig. 3c**). The top four modules with the strongest associations were: the  
232 neuronal module M2, which was most strongly negatively associated with CDR score; the  
233 astrocyte/endothelial module M20, which was most strongly positively associated with CERAD  
234 category; module M16, which was not enriched for any cell type-specific signature but was the

235 second-most negatively correlated with CDR score; and the endothelial module M18, which was  
236 the second-most positively associated with CERAD category (**Fig. 3c**). Modules which were  
237 enriched for cell type-specific signatures showed a clear demarcation with respect to their  
238 correlation with CERAD category, and Braak and CDR scores, with all neuronal modules having  
239 a negative association, while astrocyte, microglia, oligodendrocyte, and endothelial modules  
240 were all positively associated (**Fig. 3d, Supplemental Table 5**). We then assessed whether any  
241 of the modules were enriched for our candidate LOAD risk genes, considering only protein-  
242 coding genes which had a significant correlation with a trait (**Fig. 3e**). The module most  
243 enriched for our candidate risk genes was M16, one of the top four trait-associated modules,  
244 along with two other modules, which were also not enriched for any cell type-specific expression  
245 signature: module M19, which was negatively correlated with CDR; and module M29, which was  
246 positively correlated with Braak score (**Fig. 3e**).

247 Previous findings from network-based analysis of LOAD transcriptomic data have  
248 highlighted the disease-relevance of modules representing aspects of microglia<sup>23</sup> and  
249 oligodendrocyte<sup>60</sup> biology. Most recently, a co-expression network analysis of the same RNA-  
250 seq dataset we analyzed here, utilizing a different methodology, determined that neuronal  
251 modules were the most significantly affected by LOAD pathobiology<sup>24</sup>. A key difference and  
252 advantage of our study is the use of genetic association as the fundamental basis of our  
253 prioritization schema, upon which we leverage network approaches to derive new insights from  
254 LOAD brain transcriptome data. It has been recognized that genetically-supported drug targets  
255 have a much greater chance of success in clinical trials<sup>61</sup>. By using genetics as a foundation, we  
256 increase confidence in our prioritized risk genes while also increasing the probability of  
257 successful therapeutic development. Indeed, our analysis confirmed that the significant disease-  
258 relevant neuronal modules contain well-supported AD risk genes, including the familial AD gene  
259 *APP* and the *APP* processing pathway member *SORL1*<sup>62,63</sup> in module M2, which was the most

260 strongly associated with dementia status (CDR) (**Fig. 3c**). The overall expression of M2 member  
261 genes, as captured by the module eigengene, exhibited marked downregulation during the  
262 progression from normal cognitive function to advanced AD dementia (**Fig. 3f**).

263 Correspondingly, gene ontology analysis of M2 member genes revealed an enrichment for  
264 many biological processes that are profoundly affected by AD, including synaptic signaling,  
265 learning and memory, synaptic structure and organization, transmembrane transporter activity,  
266 and regulation of mitochondrial transcription and translation (**Fig. 3i**). Another module of  
267 significance was M16, a top trait-associated module with the strongest enrichment for our  
268 candidate risk genes. In comparison to M2, M16 member genes didn't display significant  
269 downregulation until more advanced levels of cognitive decline (**Fig. 3g**) and showed an  
270 enrichment for biological process terms encompassing many aspects of mitochondrial function,  
271 including oxidative phosphorylation, and glucose and purine nucleotide metabolism (**Fig. 3j**).

272

### 273 **Identification of high-priority candidate causal risk genes for functional screening *in vivo***

274 The network analysis identified important relationships between genes and modules involved in  
275 synapse and mitochondrial biology, critical components of healthy neuronal function, and LOAD.  
276 Since our candidate LOAD risk genes were enriched in these important neuronal function co-  
277 expression modules and were more closely correlated with dementia status than with  
278 neuropathological burden, we chose to functionally screen our candidates for effects on  
279 memory, in a non-amyloidosis model, in neurons *in vivo*. The *C. elegans* short/intermediate-  
280 term associative memory (S/ITAM) assay was chosen as the ideal experimental paradigm due  
281 to the highly evolutionarily conserved molecular biology which underpins memory function from  
282 worms to mammals<sup>27-29</sup>, as well as the practicality and efficiency the model affords, allowing for  
283 the testing of large numbers of candidates.

284 For an un-biased, systematic analysis, we included 4 categories of candidates (**Table 1**).

285 1) **High-priority candidate causal risk genes.** Since candidate risk genes with higher

286 centrality in the network are more likely to have disease-relevant effects if perturbed<sup>64-66</sup>, we

287 focused on candidates which occupied centrally-connected nodes within the overall co-

288 expression network. We identified “core” genes as those positioned in the top 10% of the

289 network, as determined by the eigengene-based connectivity measure kME (see Methods).

290 Interestingly, overall connectivity in the co-expression network displayed a strong correlation

291 with gene-trait association (**Fig. 3h**) so that genes with the highest absolute correlation with

292 CDR score were more likely to have high network centrality. Furthermore, core genes were

293 enriched for biological process terms involved in neuronal functions, including synaptic

294 plasticity, synaptic vesicle transport, and synapse organization, as well as ATP metabolic

295 processes, protein targeting to the membrane, and RNA catabolism (**Fig. 3k**). We ranked these

296 core network candidate risk genes by absolute correlation with dementia status and prioritized

297 the top 20 as high-priority targets for functional validation (**Supplemental Table 6**). Notably,

298 eighteen of these top 20 candidates were either not the genes usually nominated from their

299 respective loci or were genes that came from sub-GWS loci<sup>6,7</sup>. The two exceptions were the

300 well-replicated LOAD GWAS gene *PTK2B*, and the familial AD gene *APP* (**Supplemental Table**

301 **6**), which resides in a locus that reached the suggestive association threshold ( $P < 1 \times 10^{-5}$ )<sup>7</sup>. Out

302 of the 20 high-priority candidates, 16 were members of the neuronal signature modules M2 and

303 M32. The remaining four candidates were members of M16, the module with the strongest

304 enrichment for candidate LOAD risk genes (**Fig. 3e**), and one of the top four trait-associated

305 modules. 2) **CELF1/SPI1 locus candidates.** Since the expression of 18 of the 29 eQTL- and

306 chromatin interaction-implicated genes in the *CELF1/SPI1* locus (**Fig. 2e**) were significantly

307 correlated with CDR score (**Table 1, Supplemental Table 4**), we selected multiple members

308 ( $n=5$ ) of this locus to screen for potential memory effects. 3) **Well-studied LOAD GWAS genes.**

309 We selected two of the best studied GWS LOAD GWAS genes, *BIN1* and *PICALM*, based on

310 recent fine-mapping analyses using cell type-specific approaches<sup>42,43</sup> and their known role in  
311 synaptic function<sup>67-69</sup>, as strong candidates. 4) **Candidates unsupported by prioritization**  
312 **schema.** Since any effects on memory function we observed in our screen could conceivably  
313 occur due to perturbation of important neuronal genes that coincidentally exist in LOAD GWAS  
314 loci but have no actual relevance to LOAD genetic risk, we included genes from LOAD GWAS  
315 loci that were not prioritized by our analysis (*RAPSN* and *GRIN3B* (not present in MSBB RNA-  
316 seq data); *GNB2* and *TRPM7* (not correlated with CDR score); and *CHL1*, *GDE1*, and *RORA*  
317 (previously identified sub-GWS LOAD GWAS loci<sup>5</sup> which did not meet significance criteria<sup>7</sup>)), to  
318 act as surrogate negative controls. To identify the appropriate targets for our 33 prioritized  
319 candidate LOAD risk genes (**Table 1, Supplemental Table 6**), we used the web-based  
320 comparative genomics tool OrthoList 2<sup>70</sup> to identify the closest *C. elegans* orthologs for our  
321 perturbation screen. Keeping only those genes with orthology predictions supported by more  
322 than one database, we found 27 well-supported orthologs for 24 of our candidate risk genes  
323 (**Table 1, Supplemental Table 7**). As a final layer of prioritization, we selected orthologs which  
324 had been shown to be expressed in *C. elegans* neurons, as determined by our previous work  
325 characterizing the *C. elegans* neuronal transcriptome<sup>71</sup> (**Table 1, Supplemental Table 7**),  
326 leading to a total of 27 worm orthologs of 24 LOAD GWAS candidate risk genes in 17 loci for *in*  
327 *vivo* functional screening.

328

#### 329 **Neuron-specific knockdown of LOAD risk gene orthologs alters memory function in *C.*** 330 ***elegans*.**

331 Since the expression of all our candidate genes were negatively correlated with LOAD severity,  
332 with the exception of *BIN1* and *PICALM* (**Table 1**), we knocked-down the candidate genes using  
333 RNAi to mimic the directional impact of association. To generate neuronal-specific knockdown  
334 of candidate genes, we used a neuronal RNAi-sensitive strain (LC108) of *C. elegans*, which can

335 otherwise be refractory to RNA interference. We knocked-down each of the LOAD candidate  
336 risk gene orthologs from egg stage and tested for effects on short/intermediate-term memory (at  
337 1 hour and 2 hours post-conditioning) at day 1 (young adulthood). Knockdown of most of the  
338 candidate genes had no effect on naive chemotaxis (**Supplemental Fig. 3a-g**), suggesting that  
339 they did not alter normal neuronal development or function, with the exceptions of *F54A3.2*  
340 (*CKAP5*; decreased naive chemotaxis), and *aps-2* (*AP2S1*; increased naive chemotaxis), which  
341 unfortunately prevented robust assessment of any potential memory effects for these two high-  
342 priority genes. In addition, *rpt-5* (*PSMC3*), *unc-11* (*PICALM*), and *gpb-1* (*GNB2*) could not be  
343 assayed for memory effects due to motor deficits resulting from knockdown. Finally, two of the  
344 high-priority candidates, *kin-32* (*PTK2B*) and *cisd-1* (*CISD1*), could not be tested for memory  
345 effects due to a lack of available RNAi clones in the Ahringer and Vidal libraries. However, their  
346 presence in our list of top candidates gave us further confidence in our prioritization schema  
347 because of previous findings from functional studies of these genes. In mice, *PTK2B*, a well-  
348 known LOAD GWAS gene, has been shown to have important roles in hippocampal-dependent  
349 memory, synaptic plasticity, and dendritic spine structure<sup>72</sup>, and deficiency of *CISD1*, a gene  
350 involved in mitochondrial function, has been shown to elicit Parkinsonian phenotypes<sup>73</sup>.

351       Among the high-priority candidates that could be tested in the memory assays (**Table 1**),  
352 knockdown of *vha-10* (*ATP6V1G2*), *cmd-1* (*CALM3*), and *epfx-1* (*NGEF*) caused significant  
353 impacts on memory function (**Fig. 4a, 4b, 4d**), while knockdown of *jnk-1* (*MAPK9*), *apl-1* (*APP*),  
354 *Y62E10A.2* (*POP7*), *misc-1* (*SLC25A11*), and the other *CKAP5* ortholog, *zyg-9*, had no effect  
355 (**Fig. 4a-c**). Knockdown of our top candidate *vha-10* (*ATP6V1G2*) resulted in a robust memory  
356 deficit at 1hr post-conditioning (**Fig. 4a**). *ATP6V1G2* encodes a neuronal-specific subunit of the  
357 vacuolar-type ATPase (V-ATPase), a proton translocating pump that plays critical roles in the  
358 acidification of endosomal compartments including lysosomes<sup>74</sup> and the loading and release of  
359 synaptic vesicles<sup>75</sup>. Similarly, knockdown of *cmd-1* (*CALM3*), encoding the calcium-binding

360 protein calmodulin, resulted in a significant memory deficit at 1hr and 2hr post-conditioning (**Fig.**  
361 **4b**). In the brain calmodulin has diverse functions, including the regulation of synaptic signaling,  
362 endocytosis, cholesterol metabolism, and ion channel function<sup>76</sup>. Interestingly, knockdown of the  
363 high-priority risk candidate *ephx-1* (*NGEF*) and the well-known LOAD GWAS risk gene *amph-1*  
364 (*BIN1*) had no effect on short/intermediate-term memory function, but instead resulted in  
365 increased memory retention at 2hr post-conditioning (**Fig. 4d**). These results indicate that  
366 neuronal loss of expression of these genes impacts processes of active forgetting that are  
367 mediated through RAC1/CDC42<sup>77,78</sup>. Indeed, *NGEF* encodes a neuronal guanine nucleotide  
368 exchange factor (GEF) that regulates the activity of GTPases such as RAC1, RHOA, and  
369 CDC42<sup>79</sup>, and recent work has implicated *BIN1* in RAC1-mediated synaptic remodeling<sup>80</sup>.

370         Among the 5 gene orthologs from the gene dense *CELF1/SPI1* locus (**Table 1**) that did  
371 not meet the criteria for inclusion in the list of high-priority candidates, *mtch-1* (*MTCH2*), *nuo-2*  
372 (*NDUFS3*), *rpt-5* (*PSMC3*), and two orthologs of *ACP2*, *pho-5* and *pho-14*, knockdown of *mtch-*  
373 *1*, *nuo-2*, and *pho-14* showed no significant memory effects (**Fig. 4a, 4e, 4g**). However,  
374 knockdown of *pho-5*, the closest ortholog of the lysosomal acid phosphatase gene *ACP2*,  
375 resulted in a memory retention effect at 2hr post-conditioning, similar to what we observed for  
376 *ephx-1* and *amph-1* (**Fig. 4f**). This result suggests that, like *NGEF* and *BIN1*, *ACP2* is also  
377 involved in the process of active forgetting, possibly through the local turnover of synaptic  
378 proteins during dendritic spine remodeling, a process recently found to involve neuronal-activity  
379 dependent lysosome trafficking<sup>81</sup>.

380         In total, out of 24 LOAD GWAS candidate risk genes (27 worm orthologs) in 17 loci  
381 tested, we identified 5 genes in 5 loci as *in vivo* modulators of memory function (**Table 1**). Taken  
382 together, the results of our systematic perturbation screen indicate that LOAD genetic risk  
383 impacts neuronal function, particularly with respect to memory, through two primary avenues –  
384 the synapse (*ATP6V1G2*, *CALM3*, *BIN1*, *NGEF*), and the lysosome (*ACP2*, *ATP6V1G2*,

385 *CALM3*). The common point of interaction between these two fundamental components of  
386 neuronal biology is the endosomal trafficking system. Pathway and gene set analyses have  
387 previously found a significant enrichment of LOAD-associated genetic variation in genes  
388 involved in endolysosomal function<sup>82</sup>. However, the involvement of the endolysosomal system in  
389 LOAD pathobiology has typically been conceptualized in the context of amyloid and tau  
390 biology<sup>83-85</sup>. Our findings indicate that genetic contributions to neuronal dysfunction in LOAD  
391 pathobiology can affect the endolysosomal system through mechanisms which do not involve  
392 amyloid and tau, but instead directly impact the evolutionarily conserved pathways of learning  
393 and memory.

394

## 395 **Discussion**

396 Studies of the genetic underpinnings of LOAD continue to uncover new genomic loci of interest  
397 but identifying the responsible genes and translating genetic discoveries into druggable targets  
398 remains a major challenge for the field. In this study we searched for the genetic contributions  
399 which underlie neuronal dysfunction in LOAD pathobiology, using an integrative systems  
400 approach that incorporated multi-evidence-based gene-mapping and network analysis-based  
401 prioritization, with the *C. elegans* short/intermediate-term associative memory assay as an  
402 organismal level readout of the impact of our prioritized candidate risk genes on neuronal circuit  
403 integrity and function.

404 We compiled and employed a large array of functional genomics data to identify  
405 candidate risk genes from LOAD GWAS loci. Examined in the transcriptional context of the  
406 LOAD brain, we found significant associations between many candidate risk genes and  
407 phenotypic measures of cognitive dysfunction and LOAD neuropathology. Network analysis  
408 identified several neuronal co-expression modules that were the most significantly associated



409 with LOAD-associated cognitive dysfunction. We prioritized candidate risk genes by using  
410 genetic association and functional genomics evidence, focusing on core genes in the neuronal  
411 co-expression modules. A limitation of functional genomics-enabled post-GWAS gene mapping  
412 is the possibility of false positive gene nominations due to such factors as non-causal overlap  
413 between QTL and GWAS associations and non-disease relevant promiscuous chromatin  
414 interactions between GWAS variants and gene promoter regions. This limitation persists  
415 regardless of the quality and comprehensiveness of the tools and datasets used. Because of  
416 this fact, functional follow-up is critical to gaining confidence in a set of GWAS-implicated genes.  
417 Thus, we conducted functional studies of the prioritized candidate neuronal risk genes, as well  
418 as low-priority and non-prioritized genes, for effects on *in vivo* memory function in *C. elegans*.  
419 Testing 27 worm orthologs out of 24 LOAD GWAS candidate risk genes in 17 loci, this study is  
420 to our knowledge the first comprehensive functional screen of its kind. The most notable finding  
421 of this study is the identification of 5 LOAD causal risk genes, *ATP6V1G2*, *CALM3*, *BIN1*,  
422 *NGEF*, and *ACP2*, in 5 loci, as *in vivo* modulators of evolutionarily conserved memory function.

423 *ATP6V1G2* encodes a neuronal-specific subunit of the large V-ATPase complex. Our  
424 analysis prioritized *ATP6V1G2* as our top candidate risk gene, both due to its membership  
425 within the core network of genes, as well as being the candidate most significantly associated  
426 with cognitive function. *ATP6V1G2* has not been previously nominated as a LOAD risk gene,  
427 most likely due to the fact that it resides in the 6p21.32 major histocompatibility (MHC) locus, a  
428 region well-known for having an extremely complex LD structure that makes the identification of  
429 causal variants and genes in the locus particularly difficult. Multiple members of the V-ATPase  
430 complex are associated with neurological disorders and neurodegenerative conditions arising  
431 due to defective lysosomal acidification<sup>86</sup>. Additionally, V-ATPase function has also been shown  
432 to be important for the maintenance of neural stem cell renewal capacity<sup>87</sup>, and the age-related  
433 loss of this capacity is also implicated in impaired cognitive function<sup>88</sup>. In support of our findings,

434 a network-based study found *ATP6V1A* (3q13.2), another member subunit of V-ATPase, to be  
435 one of the top drivers of neuronal function that is dysregulated in the LOAD brain<sup>24</sup>.  
436 Furthermore, testing for LOAD relevance in a *Drosophila* model of A $\beta$  pathology, the authors of  
437 the study<sup>24</sup> found that *Vha68-1* (*ATP6V1A*) deficiency negatively affected neuronal activity and  
438 exacerbated A $\beta$ -mediated neuronal toxicity. These findings complement our observation that  
439 *vha-10* (*ATP6V1G2*) deficiency causes deficits in short/intermediate-term memory function in *C.*  
440 *elegans*, and further highlights evolutionarily conserved V-ATPase function as an attractive  
441 target for LOAD therapeutic development.

442 *CALM3* is one of the three identical isoforms of the calmodulin gene that is encoded in  
443 the human genome. A calcium-binding factor, calmodulin is ubiquitously expressed, and has  
444 central roles in a wide variety of processes critical to cellular health and function. Calmodulin  
445 function has been tied to LOAD pathobiology for some time, leading some to postulate a  
446 “calmodulin hypothesis” for AD pathogenesis<sup>89</sup>, as an extension of the already-established  
447 “calcium hypothesis”<sup>90</sup>. With respect to *CALM3* in particular, it has been difficult to definitively tie  
448 alterations in *CALM3* expression in the LOAD brain to genetic risk because *CALM3* resides  
449 within the greater *APOE* locus. Due to the powerful LOAD association of *APOE*, along with the  
450 strong LD relationships in this locus, identification of additional signals beyond the well-studied  
451 *APOE* coding variants<sup>91-93</sup> has been challenging. We identified and prioritized *CALM3* by our  
452 analyses for *in vivo* testing. In contrast to mammals, the *C. elegans* genome contains only one  
453 ortholog of calmodulin, *cmd-1*. We found that neuron-specific knockdown of this critical gene  
454 *cmd-1* (*CALM3*) resulted in a significant memory deficit at 1hr post-conditioning without causing  
455 significant motor or chemotaxis defects. This interesting phenotype likely involves differential  
456 regulation of calmodulin-dependent kinase II (CaMKII) activity, given its well-known roles in  
457 learning, memory, and forgetting<sup>94,95</sup>.

458           The *BIN1* (Bridging Integrator 1) locus has the second strongest LOAD association  
459 behind *APOE*. Recent variant fine-mapping studies have indicated that transcriptional regulatory  
460 elements specific to microglia might be the mediators of LOAD genetic risk in the region,  
461 resulting in altered microglial *BIN1* expression<sup>42,43</sup>. However, different cell types in the brain  
462 express different isoforms of *BIN1*, and while global transcription of *BIN1* is increased in the  
463 LOAD brain, the transcription of neuron- and astrocyte-specific isoforms are downregulated and  
464 are associated with tau pathology<sup>96</sup>. Additionally, recent work has shown that neuron-specific  
465 conditional knockout of *BIN1* results in reduced synapse density, decreased presynaptic vesicle  
466 release, and learning and memory deficits in mice<sup>67</sup>. Interestingly, we found that neuronal-  
467 specific knockdown of the *C. elegans* ortholog *amph-1* (*BIN1*) resulted in a decreased ability to  
468 “forget” an associated memory, in line with its role in RAC1-mediated synaptic remodeling<sup>80</sup>, an  
469 important component in the process of active forgetting<sup>77,78</sup>. These results suggest complex  
470 roles for neuronal BIN1 function that may have isoform-dependent phenotypes upon  
471 perturbation.

472           *NGEF*, or ephexin-1, is a neuronal guanine nucleotide exchange factor (GEF) for  
473 GTPases such as RAC1, RHOA, and CDC42. Besides central functions in axon guidance<sup>79</sup> it  
474 also has major roles in dendritic spine morphogenesis, post-synaptic organization, and pre-  
475 synaptic vesicle release through its interactions with Eph receptors like EphA4<sup>97,98</sup>. We found  
476 that, similar to *amph-1* (*BIN1*), neuronal knockdown of *ephx-1* (*NGEF*) resulted in a persistence  
477 of associative memory. In the LOAD GWAS locus that includes *NGEF*, *INPP5D* is the gene  
478 usually nominated as causal. However, a recent fine-mapping study identified neuron-specific  
479 chromatin interactions between LOAD risk variants and the *NGEF* promoter<sup>42</sup>, nominating  
480 *NGEF* as one of the top candidate neuronal causal genes. These results indicate that there  
481 might be multiple, cell type-specific, causal genes in this locus, in contrast to the prevailing view  
482 that LOAD genetic risk is conferred by dysregulation of *INPP5D* primarily in microglia<sup>99</sup>.

483           The *CELF1/SPI1* LOAD GWAS locus (11p11.2), which we screened extensively for  
484 functional effects on memory, is a gene dense locus that did not reach GWS in the Jansen et al.  
485 2019 GWAS/X meta-analysis<sup>7</sup>, but has been found as GWS in several previous studies<sup>5,6,8</sup>.  
486 *SPI1* has been found to be a likely causal gene with regard to the relevance of this locus for  
487 microglial function in AD<sup>57</sup>, but LD relationships in this locus are complex and other lines of  
488 evidence<sup>42,43,100</sup> as well as the results presented here indicate that this locus harbors additional  
489 causal genes, including *ACP2*. *ACP2* encodes lysosomal acid phosphatase 2, a phosphatase  
490 present in the lysosomal membrane which assists in the maturation of lysosomal enzymes and  
491 helps maintain the optimal pH for proper lysosomal function<sup>101</sup>. In humans *ACP2* is broadly  
492 expressed in all tissues, with particularly strong expression in pyramidal neurons of the cortex  
493 and cerebellar Purkinje cells<sup>102</sup>. *ACP2* deficiency in mice causes lysosomal storage defects,  
494 seizures, skin, cerebellum, and vertebral malformations, and ataxia<sup>103,104</sup>. Intriguingly, a recent  
495 LOAD whole exome sequencing (WES) study identified a rare missense variant in *ACP2*  
496 (D353E) to be enriched in controls compared to LOAD patients<sup>105</sup>, suggesting a protective role  
497 of *ACP2* in LOAD. Correspondingly, we found that neuron-specific knockdown of *pho-5* (*ACP2*)  
498 results in extended associative memory in *C. elegans*, even up to 3 hours post-conditioning, an  
499 interesting result which agrees directionally with the finding from the WES analysis. While  
500 complete loss of *ACP2* function results in severe neurological phenotypes<sup>103,104</sup>, these results  
501 suggest that reduced *ACP2* function could be protective with respect to LOAD-associated  
502 cognitive impairment.

503           In addition to endolysosomal biology, mitochondrial function was also enriched in our top  
504 LOAD-associated neuronal modules, and both have been implicated in the etiology of other  
505 neurodegenerative diseases, including Parkinson's disease (PD)<sup>106</sup>. Interestingly, several PD  
506 risk genes are members of the modules we highlight in this study, including *GBA* and *PINK1*  
507 (mitochondrial module M16), and *SNCA* and *PRKN* (neuronal module M2). Additionally, gene

508 ontology analysis of the LOAD-downregulated mitochondrial function module M16 found a  
509 significant enrichment for genes involved in antigen presentation (**Fig. 3k**), and recent studies  
510 have drawn links between mitochondrial antigen presentation and immune responses in PD<sup>107</sup>,  
511 suggesting potentially common mechanisms of pathogenesis between the two diseases,  
512 centered on mitochondrial biology. Notably, a previous co-expression network study found two  
513 modules which were conserved between normal aging and LOAD, one representing  
514 mitochondrial processes, and the other representing synaptic function, and identified  
515 *ATP6V1G2* as a top hub gene common to both LOAD and aging<sup>108</sup>. Since modules and genes  
516 that we identified through our work have also been found to be relevant to the normal aging  
517 process, this suggests that perhaps LOAD genetic risk factors which affect neuronal function  
518 are the earliest contributors to disease pathophysiology, as aging is the greatest risk factor for  
519 neurodegenerative disease, including LOAD.

520 In summary, our integrative analysis and *in vivo* screening revealed genetic contributions  
521 to neuronal dysfunction in LOAD pathobiology and identified evolutionarily conserved key  
522 neuronal genes and pathways involved in this process. When combined with the growing  
523 publicly available human genomic data, simple model organism systems, such as the *C.*  
524 *elegans* behavioral paradigm used here, have great potential to advance the functional genetic  
525 understanding of the complex etiology of LOAD.

526

## 527 **Acknowledgments**

528 We thank the Murphy and Suh lab members for their input. This work was supported by NIH  
529 grants AG057433, AG061521, AG055501, AG057706, AG057909, and AG017242 (Y.S.) The  
530 work was also supported by NIH grant AG057341 to C.T.M. and Y.S..

## 531 **Author Contributions**

532 Y.S. and C.T.M conceptualized the study. A.D.H., S.Z., and R.N.A. performed experiments and  
533 analyzed data. A.D.H., S.Z., R.N.A., C.T.M. and Y.S. wrote the manuscript.

534

## 535 **Methods**

### 536 Data sources

537 Alzheimer's disease GWAS summary statistics from the Jansen et al. meta-analysis<sup>7</sup> were  
538 retrieved from [https://ctg.cncr.nl/software/summary\\_statistics](https://ctg.cncr.nl/software/summary_statistics). The MSBB LOAD RNA-seq data  
539 are available through the AD Knowledge Portal (<https://adknowledgeportal.synapse.org>) under  
540 the synapse ID# syn3159438. Processed single-cell expression data from human brain<sup>32,55,56</sup>  
541 was downloaded from the PsychENCODE Integrative analysis web portal  
542 (<http://resource.psychencode.org>), as listed under the descriptor "Processed single-cell  
543 expression data merged from all three sources". Human brain cell type-specific enhancer tracks  
544 from Nott et al.<sup>42</sup> are available through the UCSC Genome Browser  
545 ([https://genome.ucsc.edu/s/nottalexi/glass\\_lab\\_BrainCellTypes\\_hg19](https://genome.ucsc.edu/s/nottalexi/glass_lab_BrainCellTypes_hg19)).

546

### 547 LOAD patient cohort

548 The Mount Sinai Brain Bank (MSBB) LOAD cohort consists of 364 postmortem control and  
549 LOAD patient brains, each accompanied by robust clinical and neuropathological phenotype  
550 metadata, with various sample subsets used for the generation of genome-, transcriptome- and  
551 proteome-scale molecular datasets, as has been described in detail previously<sup>40</sup>. For our  
552 analyses we utilized bulk RNA-seq data that had been generated from the Brodmann area 36  
553 parahippocampal gyrus region of a subset of the greater cohort (n=215). Each individual had full  
554 neuropathological assessments according to the Consortium to Establish a Registry for

555 Alzheimer's Disease (CERAD) protocol<sup>109</sup>, a Braak staging score for neurofibrillary  
556 neuropathology burden<sup>110</sup>, and a Clinical Dementia Rating (CDR) scale score<sup>111</sup> based on  
557 premortem dementia and cognitive function assessment. *APOE* genotype was available for a  
558 subset of the individuals (n=135).

559

560 Candidate gene mapping

561 To map LOAD GWAS loci to genes we used the web-based tool Functional Mapping and  
562 Annotation (FUMA, v1.3.6a)<sup>54</sup>. Using the summary statistics from the Jansen et al. meta-  
563 analysis, a sub-genome-wide significance threshold of  $P < 1 \times 10^{-5}$  was used to identify all  
564 independent ( $r^2 < 0.1$ , EUR population, 1000 Genomes) loci. Within each identified locus, all  
565 SNPs that met the significance threshold were used for mapping, as well as SNPs in strong  
566 linkage disequilibrium ( $r^2 > 0.6$ , EUR population, 1000 Genomes) with the index variant of each  
567 locus. Gene mapping was conducted using two strategies: 1) Selecting genes with significant  
568 cis-eQTL associations (FDR < 0.05) with the LOAD GWAS SNPs (i.e., expression of the gene is  
569 associated with allelic variation at the SNP). Six large-scale brain eQTL studies were utilized for  
570 this purpose – PsychENCODE<sup>32</sup>, CommonMind Consortium<sup>33</sup>, BRAINEAC<sup>34</sup>, BrainSeq<sup>35</sup>,  
571 ROSMAP<sup>36</sup>, and GTEx v8 (Brain and Nerve tissue only)<sup>37</sup>; and 2) Selecting genes by identifying  
572 significant chromatin interactions (FDR  $\leq 1e-6$ ) between gene promoter regions (250 bp up- and  
573 500 bp downstream of the transcription start site) and the LOAD GWAS SNPs, as identified by  
574 Hi-C data. Data from three Hi-C studies of brain and neural tissue were utilized – DLPFC from  
575 PsychENCODE<sup>32</sup>, Adult and Fetal cortex data from the study of Giusti-Rodríguez et al.<sup>38</sup>, and  
576 DLPFC, Hippocampus, and Neural Progenitor Cell data from the study of Schmitt et al.<sup>39</sup>.

577

578 Cell type expression specificity of candidate risk genes

579 We investigated the cell type-specific expression of our candidate risk genes by examining their  
580 expression patterns in published human single-cell transcriptome data from the temporal  
581 cortex<sup>32,55,56</sup>. Preprocessed single-cell expression data<sup>32,55,56</sup> was downloaded as described  
582 above, and only the adult, broad cell class data was retained (Astrocyte, Endothelial, Microglia,  
583 Neuron, Oligodendrocyte, OPC). Expression data was scaled and log-normalized and displayed  
584 as a heatmap by using the R package ‘pheatmap’.

585

## 586 Statistics

587 Descriptions of all statistical tests performed are included in the figure legends or the respective  
588 Methods sections, where relevant.

589

## 590 Co-expression network analysis

591 The R package ‘WGCNA’<sup>58</sup> was used to construct a co-expression network from the MSBB  
592 LOAD brain RNA-seq data<sup>40</sup>. For the creation of the network we utilized the publicly available  
593 preprocessed expression matrix (see Data sources) which had already been normalized and  
594 adjusted for sex, race, age, RNA integrity, post-mortem interval, and batch effect. A weighted  
595 co-expression network was built using the preprocessed expression values and the  
596 blockwiseModules WGCNA function with the following parameters: soft-thresholding power = 8,  
597 TOMType = “signed”, deepSplit = 2, minimum module size of 15, merge cut height of 0.25,  
598 signed hybrid network with pamRespectsDendro = FALSE. This resulted in the identification of  
599 32 modules of co-expressed genes, from which we calculated module eigengenes (MEs).

600 Correlations between clinical and neuropathological traits and individual gene expression or

601 MEs were computed as Pearson’s correlations and were corrected for multiple testing according



602 to the FDR (Benjamini-Hochberg) method. Significance was determined using an adjusted  $P$ -  
603 value cutoff of 0.05.

604

605 Enrichment analysis

606 Enrichment of LOAD GWAS signal<sup>7</sup> in open chromatin regions of human brain cell types was  
607 calculated according to the methodology of Wang et al.<sup>45</sup>, using called peaks from scATAC-seq  
608 of the human brain<sup>43</sup>. At each p-value significance cut-off, using a sliding  $-\log(p\text{-value})$  threshold  
609 from 0 to 10 in steps of 0.1, the proportion of SNPs in ATAC-seq peaks with p-values more  
610 significant than the cut-off, the foreground, was calculated against the proportion of SNPs  
611 present in the summary statistics (~13 m). Co-expression modules were tested for significant  
612 overlap with the cell type-specific expression signatures of five major brain cell types (neurons,  
613 microglia, astrocytes, oligodendrocytes, endothelial) identified through human brain single-cell  
614 RNA-sequencing data<sup>55</sup>, and reported previously<sup>59</sup>. Enrichment statistics were calculated by one  
615 tailed Fisher's exact test and corrected for multiple comparisons by the FDR (Benjamini-  
616 Hochberg) method. Significance was determined using an adjusted  $P$ -value cutoff of 0.05.  
617 Functional enrichment of biological pathways within the co-expression modules was assessed  
618 by over-representation test, using the R package 'clusterProfiler'<sup>112</sup>, considering all genes  
619 present in the MSBB RNA-seq dataset as the set of background genes. The Gene Ontology  
620 (Biological Process) gene sets used for the enrichment analysis came from the Molecular  
621 Signatures Database (MSigDB) v7.0<sup>113,114</sup>. Multiple testing correction was performed according  
622 to the FDR (Benjamini-Hochberg) method and significance was determined using an adjusted  
623  $P$ -value cutoff of 0.05. Significantly enriched terms were visualized as a network map, with  
624 edges connecting overlapping gene sets, using the emapplot function of the R package  
625 'enrichplot'<sup>115</sup>, with layout = "kk".

626

## 627 Identification of core network genes

628 To identify genes with high trait-relevance that also reside in centrally-located positions within  
629 the co-expression network, we took the approach used by Chateigner et al.<sup>116</sup>. By utilizing the  
630 module membership measure kME (the correlation between the expression of a gene and the  
631 module eigengene), it can be appreciated that the genes with the highest kME in a given  
632 module are also the most correlated to the traits that are most closely associated with the  
633 module eigengene. This relationship demonstrates the utility of employing kME as a centrality  
634 score when prioritizing genes with both relevance to the trait of interest and high network  
635 connectivity. Using kME to define the topological positions of all the genes in the co-expression  
636 network, the max kME was identified for every gene (i.e., the score with respect to the module  
637 to which the gene was assigned), and “core” network genes were then defined as the top 10%  
638 of genes with the highest global absolute scores.

639

## 640 Worm cultivation

641 All strains were maintained at 20°C on plates made from high growth medium (HGM: 3 g/L  
642 NaCl, 20 g/L Bacto-peptone, 30 g/L Bacto-agar in distilled water, 4 mL/L cholesterol (5 mg/mL in  
643 ethanol), 1 mL/L 1M CaCl<sub>2</sub>, 1 mL/L 1M MgSO<sub>4</sub>, and 25 mL/L 1M potassium phosphate buffer  
644 (pH 6.0) added to molten agar after autoclaving (Brenner, 1974) with OP50 *E.coli* as the food  
645 source. For RNAi treatment, the standard HGM was supplemented with 1 mL/L 1M IPTG  
646 (isopropyl b-d-1-thiogalactopyranoside) and 1 mL/L 100 mg/mL carbenicillin, and plates were  
647 seeded with HT115 *E. coli* for ad libitum feeding. Worms were synchronized by collecting eggs  
648 from hermaphrodites via exposure to an alkaline-bleach solution (80 mL water, 5 mL 5N KOH,

649 15 mL sodium hypochlorite); collected eggs were repeatedly washed in M9 buffer (6 g/L  
650 Na<sub>2</sub>HPO<sub>4</sub>, 3 g/L KH<sub>2</sub>PO<sub>4</sub>, 5 g/L NaCl and 1 mL/L 1M MgSO<sub>4</sub> in distilled water; Brenner, 1974).

651

652 Strains

653 LC108 (*vIs69 [pCFJ90(Pmyo-2::mCherry + Punc-119::sid-1)]*)

654 Short/intermediate-term associative memory training

655 Worms were tested for short/intermediate-term memory as previously described (Kauffman et  
656 al., 2010). Briefly, synchronized day 1 adult hermaphrodites were washed from HGM plates with  
657 M9 buffer for 3 times. Then the animals were starved for 1 hr in M9 buffer. For training, worms  
658 were transferred to 10 cm NGM conditioning plates seeded with OP50 E. coli bacteria and with  
659 18 ul 10% 2-butanone (Acros Organics) in ethanol on the lid for 1 hr. After conditioning, the  
660 trained worms were tested for chemotaxis towards 10% butanone vs. an ethanol control either  
661 immediately (0 hr) or after being transferred to 10 cm NGM plates with fresh OP50 for specified  
662 intervals before testing (30 min-2 hr). Chemotaxis indices (CI) were calculated as follow:

663  $(\#wormsButanone - \#wormsEthanol) / (\text{Total } \#worms)$ . Learning indices (LI) are:  $LI_{\text{trained}} = CI_{\text{trained}} -$   
664  $CI_{\text{naive}}$ .

665

- 666 1. Association, A.s. 2016 Alzheimer's Disease Facts and Figures. *Alzheimer's & Dementia* **12**(2016).
- 667 2. De Strooper, B. & Karran, E. The Cellular Phase of Alzheimer's Disease. *Cell* **164**, 603-15 (2016).
- 668 3. Scheltens, P. *et al.* Alzheimer's disease. *Lancet* **388**, 505-17 (2016).
- 669 4. Cummings, J. *et al.* Drug development in Alzheimer's disease: the path to 2025. *Alzheimers Res*  
670 *Ther* **8**, 39 (2016).
- 671 5. Lambert, J.C. *et al.* Meta-analysis of 74,046 individuals identifies 11 new susceptibility loci for  
672 Alzheimer's disease. *Nat Genet* **45**, 1452-8 (2013).
- 673 6. Kunkle, B.W. *et al.* Genetic meta-analysis of diagnosed Alzheimer's disease identifies new risk  
674 loci and implicates Abeta, tau, immunity and lipid processing. *Nat Genet* **51**, 414-430 (2019).
- 675 7. Jansen, I.E. *et al.* Genome-wide meta-analysis identifies new loci and functional pathways  
676 influencing Alzheimer's disease risk. *Nat Genet* **51**, 404-413 (2019).
- 677 8. Marioni, R.E. *et al.* GWAS on family history of Alzheimer's disease. *Transl Psychiatry* **8**, 99 (2018).

- 678 9. Maurano, M.T. *et al.* Systematic localization of common disease-associated variation in  
679 regulatory DNA. *Science* **337**, 1190-5 (2012).
- 680 10. Novikova, G., Andrews, S.J., Renton, A.E. & Marcora, E. Beyond association: successes and  
681 challenges in linking non-coding genetic variation to functional consequences that modulate  
682 Alzheimer's disease risk. *Mol Neurodegener* **16**, 27 (2021).
- 683 11. Pimenova, A.A., Raj, T. & Goate, A.M. Untangling Genetic Risk for Alzheimer's Disease. *Biol*  
684 *Psychiatry* **83**, 300-310 (2018).
- 685 12. Cano-Gamez, E. & Trynka, G. From GWAS to Function: Using Functional Genomics to Identify the  
686 Mechanisms Underlying Complex Diseases. *Front Genet* **11**, 424 (2020).
- 687 13. Sims, R., Hill, M. & Williams, J. The multiplex model of the genetics of Alzheimer's disease. *Nat*  
688 *Neurosci* **23**, 311-322 (2020).
- 689 14. Sims, R. *et al.* Rare coding variants in PLCG2, ABI3, and TREM2 implicate microglial-mediated  
690 innate immunity in Alzheimer's disease. *Nat Genet* **49**, 1373-1384 (2017).
- 691 15. Jonsson, T. *et al.* Variant of TREM2 associated with the risk of Alzheimer's disease. *N Engl J Med*  
692 **368**, 107-16 (2013).
- 693 16. Guerreiro, R. *et al.* TREM2 variants in Alzheimer's disease. *N Engl J Med* **368**, 117-27 (2013).
- 694 17. van der Lee, S.J. *et al.* A nonsynonymous mutation in PLCG2 reduces the risk of Alzheimer's  
695 disease, dementia with Lewy bodies and frontotemporal dementia, and increases the likelihood  
696 of longevity. *Acta Neuropathol* **138**, 237-250 (2019).
- 697 18. Karahan, H. *et al.* Deletion of Abi3 gene locus exacerbates neuropathological features of  
698 Alzheimer's disease in a mouse model of A $\beta$  amyloidosis. *Sci Adv* **7**, eabe3954 (2021).
- 699 19. Obst, J. *et al.* PLCy2 regulates TREM2 signalling and integrin-mediated adhesion and migration of  
700 human iPSC-derived macrophages. *Sci Rep* **11**, 19842 (2021).
- 701 20. McQuade, A. *et al.* Gene expression and functional deficits underlie TREM2-knockout microglia  
702 responses in human models of Alzheimer's disease. *Nat Commun* **11**, 5370 (2020).
- 703 21. Parhizkar, S. *et al.* Loss of TREM2 function increases amyloid seeding but reduces plaque-  
704 associated ApoE. *Nat Neurosci* **22**, 191-204 (2019).
- 705 22. Andreone, B.J. *et al.* Alzheimer's-associated PLCy2 is a signaling node required for both TREM2  
706 function and the inflammatory response in human microglia. *Nat Neurosci* **23**, 927-938 (2020).
- 707 23. Zhang, B. *et al.* Integrated systems approach identifies genetic nodes and networks in late-onset  
708 Alzheimer's disease. *Cell* **153**, 707-20 (2013).
- 709 24. Wang, M. *et al.* Transformative Network Modeling of Multi-omics Data Reveals Detailed Circuits,  
710 Key Regulators, and Potential Therapeutics for Alzheimer's Disease. *Neuron* **109**, 257-272.e14  
711 (2021).
- 712 25. Meyer, K. *et al.* REST and Neural Gene Network Dysregulation in iPSC Models of Alzheimer's  
713 Disease. *Cell Rep* **26**, 1112-1127.e9 (2019).
- 714 26. Lagomarsino, V.N. *et al.* Stem cell-derived neurons reflect features of protein networks,  
715 neuropathology, and cognitive outcome of their aged human donors. *Neuron* **109**, 3402-3420.e9  
716 (2021).
- 717 27. Stein, G.M. & Murphy, C.T. *C. elegans* positive olfactory associative memory is a molecularly  
718 conserved behavioral paradigm. *Neurobiol Learn Mem* **115**, 86-94 (2014).
- 719 28. Kauffman, A.L., Ashraf, J.M., Corces-Zimmerman, M.R., Landis, J.N. & Murphy, C.T. Insulin  
720 signaling and dietary restriction differentially influence the decline of learning and memory with  
721 age. *PLoS Biol* **8**, e1000372 (2010).
- 722 29. Kauffman, A. *et al.* *C. elegans* positive butanone learning, short-term, and long-term associative  
723 memory assays. *J Vis Exp* (2011).
- 724 30. Arey, R.N. & Murphy, C.T. Conserved regulators of cognitive aging: From worms to humans.  
725 *Behav Brain Res* **322**, 299-310 (2017).

- 726 31. Lakhina, V. *et al.* Genome-wide functional analysis of CREB/long-term memory-dependent  
727 transcription reveals distinct basal and memory gene expression programs. *Neuron* **85**, 330-45  
728 (2015).
- 729 32. Wang, D. *et al.* Comprehensive functional genomic resource and integrative model for the  
730 human brain. *Science* **362**(2018).
- 731 33. Fromer, M. *et al.* Gene expression elucidates functional impact of polygenic risk for  
732 schizophrenia. *Nat Neurosci* **19**, 1442-1453 (2016).
- 733 34. Ramasamy, A. *et al.* Genetic variability in the regulation of gene expression in ten regions of the  
734 human brain. *Nat Neurosci* **17**, 1418-28 (2014).
- 735 35. Jaffe, A.E. *et al.* Developmental and genetic regulation of the human cortex transcriptome  
736 illuminate schizophrenia pathogenesis. *Nat Neurosci* **21**, 1117-1125 (2018).
- 737 36. Ng, B. *et al.* An xQTL map integrates the genetic architecture of the human brain's transcriptome  
738 and epigenome. *Nat Neurosci* **20**, 1418-1426 (2017).
- 739 37. The GTEx Consortium atlas of genetic regulatory effects across human tissues. *Science* **369**,  
740 1318-1330 (2020).
- 741 38. Giusti-Rodríguez, P. *et al.* Using three-dimensional regulatory chromatin interactions from adult  
742 and fetal cortex to interpret genetic results for psychiatric disorders and cognitive traits. *bioRxiv*,  
743 406330 (2019).
- 744 39. Schmitt, A.D. *et al.* A Compendium of Chromatin Contact Maps Reveals Spatially Active Regions  
745 in the Human Genome. *Cell Rep* **17**, 2042-2059 (2016).
- 746 40. Wang, M. *et al.* The Mount Sinai cohort of large-scale genomic, transcriptomic and proteomic  
747 data in Alzheimer's disease. *Sci Data* **5**, 180185 (2018).
- 748 41. Tansey, K.E., Cameron, D. & Hill, M.J. Genetic risk for Alzheimer's disease is concentrated in  
749 specific macrophage and microglial transcriptional networks. *Genome Med* **10**, 14 (2018).
- 750 42. Nott, A. *et al.* Brain cell type-specific enhancer-promoter interactome maps and disease-risk  
751 association. *Science* **366**, 1134-1139 (2019).
- 752 43. Corces, M.R. *et al.* Single-cell epigenomic analyses implicate candidate causal variants at  
753 inherited risk loci for Alzheimer's and Parkinson's diseases. *Nat Genet* **52**, 1158-1168 (2020).
- 754 44. Novikova, G. *et al.* Integration of Alzheimer's disease genetics and myeloid genomics identifies  
755 disease risk regulatory elements and genes. *Nat Commun* **12**, 1610 (2021).
- 756 45. Wang, X. *et al.* Discovery and validation of sub-threshold genome-wide association study loci  
757 using epigenomic signatures. *Elife* **5**(2016).
- 758 46. Wang, A. *et al.* Single-cell multiomic profiling of human lungs reveals cell-type-specific and age-  
759 dynamic control of SARS-CoV2 host genes. *Elife* **9**(2020).
- 760 47. Nelson, C.P. *et al.* Association analyses based on false discovery rate implicate new loci for  
761 coronary artery disease. *Nat Genet* **49**, 1385-1391 (2017).
- 762 48. Li, Z. *et al.* Integrating Mouse and Human Genetic Data to Move beyond GWAS and Identify  
763 Causal Genes in Cholesterol Metabolism. *Cell Metab* **31**, 741-754.e5 (2020).
- 764 49. Hammond, R.K. *et al.* Biological constraints on GWAS SNPs at suggestive significance thresholds  
765 reveal additional BMI loci. *Elife* **10**(2021).
- 766 50. Claussnitzer, M. *et al.* FTO Obesity Variant Circuitry and Adipocyte Browning in Humans. *N Engl J*  
767 *Med* **373**, 895-907 (2015).
- 768 51. Musunuru, K. *et al.* From noncoding variant to phenotype via SORT1 at the 1p13 cholesterol  
769 locus. *Nature* **466**, 714-9 (2010).
- 770 52. Zhu, Z. *et al.* Integration of summary data from GWAS and eQTL studies predicts complex trait  
771 gene targets. *Nat Genet* **48**, 481-7 (2016).
- 772 53. Porcu, E. *et al.* Mendelian randomization integrating GWAS and eQTL data reveals genetic  
773 determinants of complex and clinical traits. *Nat Commun* **10**, 3300 (2019).

- 774 54. Watanabe, K., Taskesen, E., van Bochoven, A. & Posthuma, D. Functional mapping and  
775 annotation of genetic associations with FUMA. *Nat Commun* **8**, 1826 (2017).
- 776 55. Darmanis, S. *et al.* A survey of human brain transcriptome diversity at the single cell level. *Proc*  
777 *Natl Acad Sci U S A* **112**, 7285-90 (2015).
- 778 56. Lake, B.B. *et al.* Neuronal subtypes and diversity revealed by single-nucleus RNA sequencing of  
779 the human brain. *Science* **352**, 1586-90 (2016).
- 780 57. Huang, K.L. *et al.* A common haplotype lowers PU.1 expression in myeloid cells and delays onset  
781 of Alzheimer's disease. *Nat Neurosci* **20**, 1052-1061 (2017).
- 782 58. Langfelder, P. & Horvath, S. WGCNA: an R package for weighted correlation network analysis.  
783 *BMC Bioinformatics* **9**, 559 (2008).
- 784 59. Wang, M. *et al.* Integrative network analysis of nineteen brain regions identifies molecular  
785 signatures and networks underlying selective regional vulnerability to Alzheimer's disease.  
786 *Genome Med* **8**, 104 (2016).
- 787 60. McKenzie, A.T. *et al.* Multiscale network modeling of oligodendrocytes reveals molecular  
788 components of myelin dysregulation in Alzheimer's disease. *Mol Neurodegener* **12**, 82 (2017).
- 789 61. Nelson, M.R. *et al.* The support of human genetic evidence for approved drug indications. *Nat*  
790 *Genet* **47**, 856-60 (2015).
- 791 62. Raghavan, N.S. *et al.* Whole-exome sequencing in 20,197 persons for rare variants in Alzheimer's  
792 disease. *Ann Clin Transl Neurol* **5**, 832-842 (2018).
- 793 63. Vardarajan, B.N. *et al.* Coding mutations in SORL1 and Alzheimer disease. *Ann Neurol* **77**, 215-27  
794 (2015).
- 795 64. Albert, R., Jeong, H. & Barabasi, A.L. Error and attack tolerance of complex networks. *Nature*  
796 **406**, 378-82 (2000).
- 797 65. Jeong, H., Mason, S.P., Barabási, A.L. & Oltvai, Z.N. Lethality and centrality in protein networks.  
798 *Nature* **411**, 41-2 (2001).
- 799 66. Kim, S.S. *et al.* Genes with High Network Connectivity Are Enriched for Disease Heritability. *Am J*  
800 *Hum Genet* **104**, 896-913 (2019).
- 801 67. De Rossi, P. *et al.* Neuronal BIN1 Regulates Presynaptic Neurotransmitter Release and Memory  
802 Consolidation. *Cell Rep* **30**, 3520-3535.e7 (2020).
- 803 68. Harel, A., Mattson, M.P. & Yao, P.J. CALM, a clathrin assembly protein, influences cell surface  
804 GluR2 abundance. *Neuromolecular Med* **13**, 88-90 (2011).
- 805 69. Schürmann, B. *et al.* A novel role for the late-onset Alzheimer's disease (LOAD)-associated  
806 protein Bin1 in regulating postsynaptic trafficking and glutamatergic signaling. *Mol Psychiatry*  
807 **25**, 2000-2016 (2020).
- 808 70. Kim, W., Underwood, R.S., Greenwald, I. & Shaye, D.D. OrthoList 2: A New Comparative  
809 Genomic Analysis of Human and *Caenorhabditis elegans* Genes. *Genetics* **210**, 445-461 (2018).
- 810 71. Kaletsky, R. *et al.* The *C. elegans* adult neuronal IIS/FOXO transcriptome reveals adult phenotype  
811 regulators. *Nature* **529**, 92-6 (2016).
- 812 72. Giralt, A. *et al.* Pyk2 modulates hippocampal excitatory synapses and contributes to cognitive  
813 deficits in a Huntington's disease model. *Nat Commun* **8**, 15592 (2017).
- 814 73. Geldenhuys, W.J. *et al.* MitoNEET (CISD1) Knockout Mice Show Signs of Striatal Mitochondrial  
815 Dysfunction and a Parkinson's Disease Phenotype. *ACS Chem Neurosci* **8**, 2759-2765 (2017).
- 816 74. Mindell, J.A. Lysosomal acidification mechanisms. *Annu Rev Physiol* **74**, 69-86 (2012).
- 817 75. Di Giovanni, J. *et al.* V-ATPase membrane sector associates with synaptobrevin to modulate  
818 neurotransmitter release. *Neuron* **67**, 268-79 (2010).
- 819 76. Burgoyne, R.D., Helassa, N., McCue, H.V. & Haynes, L.P. Calcium Sensors in Neuronal Function  
820 and Dysfunction. *Cold Spring Harb Perspect Biol* **11**(2019).
- 821 77. Davis, R.L. & Zhong, Y. The Biology of Forgetting-A Perspective. *Neuron* **95**, 490-503 (2017).

- 822 78. Noyes, N.C., Phan, A. & Davis, R.L. Memory suppressor genes: Modulating acquisition,  
823 consolidation, and forgetting. *Neuron* **109**, 3211-3227 (2021).
- 824 79. Sahin, M. *et al.* Eph-dependent tyrosine phosphorylation of ephexin1 modulates growth cone  
825 collapse. *Neuron* **46**, 191-204 (2005).
- 826 80. Daudin, R. *et al.* BIN1 genetic risk factor for Alzheimer is sufficient to induce early structural tract  
827 alterations in entorhinal-hippocampal area and memory-related hippocampal multi-scale  
828 impairments. *bioRxiv*, 437228 (2021).
- 829 81. Goo, M.S. *et al.* Activity-dependent trafficking of lysosomes in dendrites and dendritic spines. *J*  
830 *Cell Biol* **216**, 2499-2513 (2017).
- 831 82. Gao, S., Casey, A.E., Sargeant, T.J. & Mäkinen, V.P. Genetic variation within endolysosomal  
832 system is associated with late-onset Alzheimer's disease. *Brain* **141**, 2711-2720 (2018).
- 833 83. Nixon, R.A. Amyloid precursor protein and endosomal-lysosomal dysfunction in Alzheimer's  
834 disease: inseparable partners in a multifactorial disease. *Faseb j* **31**, 2729-2743 (2017).
- 835 84. Van Acker, Z.P., Bretou, M. & Annaert, W. Endo-lysosomal dysregulations and late-onset  
836 Alzheimer's disease: impact of genetic risk factors. *Mol Neurodegener* **14**, 20 (2019).
- 837 85. Whyte, L.S., Lau, A.A., Hemsley, K.M., Hopwood, J.J. & Sargeant, T.J. Endo-lysosomal and  
838 autophagic dysfunction: a driving factor in Alzheimer's disease? *J Neurochem* **140**, 703-717  
839 (2017).
- 840 86. Song, Q., Meng, B., Xu, H. & Mao, Z. The emerging roles of vacuolar-type ATPase-dependent  
841 Lysosomal acidification in neurodegenerative diseases. *Transl Neurodegener* **9**, 17 (2020).
- 842 87. Lange, C. *et al.* The H(+) vacuolar ATPase maintains neural stem cells in the developing mouse  
843 cortex. *Stem Cells Dev* **20**, 843-50 (2011).
- 844 88. Navarro Negredo, P., Yeo, R.W. & Brunet, A. Aging and Rejuvenation of Neural Stem Cells and  
845 Their Niches. *Cell Stem Cell* **27**, 202-223 (2020).
- 846 89. O'Day, D.H. & Myre, M.A. Calmodulin-binding domains in Alzheimer's disease proteins:  
847 extending the calcium hypothesis. *Biochem Biophys Res Commun* **320**, 1051-4 (2004).
- 848 90. Khachaturian, Z.S. Calcium hypothesis of Alzheimer's disease and brain aging. *Ann N Y Acad Sci*  
849 **747**, 1-11 (1994).
- 850 91. Chouraki, V. & Seshadri, S. Genetics of Alzheimer's disease. *Adv Genet* **87**, 245-94 (2014).
- 851 92. Moreno-Grau, S. *et al.* Genome-wide significant risk factors on chromosome 19 and the APOE  
852 locus. *Oncotarget* **9**, 24590-24600 (2018).
- 853 93. Zhou, X. *et al.* Non-coding variability at the APOE locus contributes to the Alzheimer's risk. *Nat*  
854 *Commun* **10**, 3310 (2019).
- 855 94. Giese, K.P. & Mizuno, K. The roles of protein kinases in learning and memory. *Learn Mem* **20**,  
856 540-52 (2013).
- 857 95. Inoue, A. *et al.* Forgetting in *C. elegans* is accelerated by neuronal communication via the TIR-  
858 1/JNK-1 pathway. *Cell Rep* **3**, 808-19 (2013).
- 859 96. Taga, M. *et al.* BIN1 protein isoforms are differentially expressed in astrocytes, neurons, and  
860 microglia: neuronal and astrocyte BIN1 are implicated in tau pathology. *Mol Neurodegener* **15**,  
861 44 (2020).
- 862 97. Shi, L., Fu, A.K. & Ip, N.Y. Multiple roles of the Rho GEF ephexin1 in synapse remodeling.  
863 *Commun Integr Biol* **3**, 622-4 (2010).
- 864 98. Fu, W.Y. *et al.* Cdk5 regulates EphA4-mediated dendritic spine retraction through an ephexin1-  
865 dependent mechanism. *Nat Neurosci* **10**, 67-76 (2007).
- 866 99. Pedicone, C. *et al.* Pan-SHIP1/2 inhibitors promote microglia effector functions essential for CNS  
867 homeostasis. *J Cell Sci* **133**(2020).
- 868 100. Karch, C.M., Ezerskiy, L.A., Bertelsen, S. & Goate, A.M. Alzheimer's Disease Risk Polymorphisms  
869 Regulate Gene Expression in the ZCWPW1 and the CELF1 Loci. *PLoS One* **11**, e0148717 (2016).

- 870 101. Makrypidi, G. *et al.* Mannose 6 dephosphorylation of lysosomal proteins mediated by acid  
871 phosphatases Acp2 and Acp5. *Mol Cell Biol* **32**, 774-82 (2012).
- 872 102. Geier, C., Kreysing, J., Boettcher, H., Pohlmann, R. & von Figura, K. Localization of lysosomal acid  
873 phosphatase mRNA in mouse tissues. *J Histochem Cytochem* **40**, 1275-82 (1992).
- 874 103. Mannan, A.U. *et al.* Mutation in the gene encoding lysosomal acid phosphatase (Acp2) causes  
875 cerebellum and skin malformation in mouse. *Neurogenetics* **5**, 229-38 (2004).
- 876 104. Saftig, P. *et al.* Mice deficient in lysosomal acid phosphatase develop lysosomal storage in the  
877 kidney and central nervous system. *J Biol Chem* **272**, 18628-35 (1997).
- 878 105. Bis, J.C. *et al.* Whole exome sequencing study identifies novel rare and common Alzheimer's-  
879 Associated variants involved in immune response and transcriptional regulation. *Mol Psychiatry*  
880 (2018).
- 881 106. Chang, D. *et al.* A meta-analysis of genome-wide association studies identifies 17 new  
882 Parkinson's disease risk loci. *Nat Genet* **49**, 1511-1516 (2017).
- 883 107. Matheoud, D. *et al.* Parkinson's Disease-Related Proteins PINK1 and Parkin Repress  
884 Mitochondrial Antigen Presentation. *Cell* **166**, 314-327 (2016).
- 885 108. Miller, J.A., Oldham, M.C. & Geschwind, D.H. A systems level analysis of transcriptional changes  
886 in Alzheimer's disease and normal aging. *J Neurosci* **28**, 1410-20 (2008).
- 887 109. Mirra, S.S. *et al.* The Consortium to Establish a Registry for Alzheimer's Disease (CERAD). Part II.  
888 Standardization of the neuropathologic assessment of Alzheimer's disease. *Neurology* **41**, 479-  
889 86 (1991).
- 890 110. Braak, H. & Braak, E. Neuropathological staging of Alzheimer-related changes. *Acta*  
891 *Neuropathol* **82**, 239-59 (1991).
- 892 111. Morris, J.C. The Clinical Dementia Rating (CDR): current version and scoring rules. *Neurology* **43**,  
893 2412-4 (1993).
- 894 112. Yu, G., Wang, L.G., Han, Y. & He, Q.Y. clusterProfiler: an R package for comparing biological  
895 themes among gene clusters. *Omic*s **16**, 284-7 (2012).
- 896 113. Subramanian, A. *et al.* Gene set enrichment analysis: a knowledge-based approach for  
897 interpreting genome-wide expression profiles. *Proc Natl Acad Sci U S A* **102**, 15545-50 (2005).
- 898 114. Liberzon, A. *et al.* The Molecular Signatures Database (MSigDB) hallmark gene set collection. *Cell*  
899 *Syst* **1**, 417-425 (2015).
- 900 115. Yu, G., Wang, L.G., Yan, G.R. & He, Q.Y. DOSE: an R/Bioconductor package for disease ontology  
901 semantic and enrichment analysis. *Bioinformatics* **31**, 608-9 (2015).
- 902 116. Chateigner, A. *et al.* Gene expression predictions and networks in natural populations supports  
903 the omnigenic theory. *BMC Genomics* **21**, 416 (2020).

904

905 **Figure 1. Integrative systems biology approach for LOAD risk gene identification and**  
906 **functional screening**

907 **(a)** Candidate risk genes are identified from LOAD GWAS summary statistics, using functional  
908 genomics data from large-scale brain eQTL and chromatin interaction studies. **(b)** Relevance of  
909 candidate risk genes to LOAD biology is assessed by correlation of expression patterns with  
910 clinical and neuropathological traits, and connectivity within co-expression networks built from



911 LOAD cohort brain RNA-seq data. (c) Prioritized candidate risk genes are screened for *in vivo*  
912 effects on memory function through the use of associative memory assays in *C. elegans*.

913

914 **Figure 2. Data from eQTL and chromatin interaction studies implicates potential causal**  
915 **genes in LOAD GWAS loci**

916 (a) Enrichment signal for sub-threshold LOAD GWAS SNPs in neuronal open chromatin  
917 becomes evident following the removal of GWS loci and nearby SNPs (+/- 1 Mb), becoming  
918 similar in magnitude to that of microglia. Each point on the curves represents the difference in  
919 fold of the proportion of SNPs with a p-value below the cutoff in the ATAC-seq peaks versus all  
920 SNPs present in the GWAS summary statistics. (b) Numbers of candidate risk genes unique to,  
921 and shared by, the two gene-mapping methods. (c) Distribution of candidate risk genes by gene  
922 type and significance threshold. (d) Heatmap of cell type-specific expression patterns of  
923 candidate risk genes in the human brain. Color scale represents relative expression across cell  
924 types (red = higher, blue = lower). (e) Example LOAD GWAS locus (*CELF1/SPI1*), highlighting  
925 challenges in the identification of causal genes. Top to bottom – Manhattan plot of  $-\log_{10}(p$ -  
926 value) association statistics from Jansen et al., with the top SNP rs10437655 highlighted in  
927 purple and remaining variants colored according to LD ( $r^2$ ) with the lead SNP; Genome browser  
928 track showing all coding genes present in the locus. Gene names colored in green or blue are  
929 candidate risk genes nominated by QTL evidence or SNP-promoter interaction evidence,  
930 respectively. Gene names colored in red are candidate risk genes nominated by both kinds of  
931 evidence; Track showing the location of significant GWAS SNPs ( $P < 1 \times 10^{-5}$ ), and SNPs in LD  
932 ( $r^2 > 0.6$ ); Tracks indicating the positions of enhancer elements identified in different human brain  
933 cell types; Track illustrating the significant chromatin interactions between LOAD GWAS SNPs  
934 and gene promoters in the locus; Track illustrating the significant eQTL associations between  
935 LOAD GWAS SNPs and genes in the locus.

936

937 **Figure 3. Co-expression network analysis identifies candidate LOAD risk genes as**  
938 **dysregulated neuronal subnetwork hubs in the LOAD brain**

939 (a) Co-expression network analysis of RNA-seq data from the parahippocampal gyrus identifies  
940 32 distinct co-expression modules. Modules enriched for cell type-specific gene expression  
941 signatures are indicated. (b) UpSet plot of the intersections between gene sets found to be  
942 significantly associated with the listed traits. (c) Association significance of correlations between  
943 module eigengenes and traits. Significance of the top four trait-associated modules (M2, M20,  
944 M16, M18) is indicated. Bars extending past the dotted line represent  $FDR < 0.05$ . (d) Scatter  
945 plot of module eigengene association with CDR vs. enrichment of cell type gene expression  
946 signature. Blue dots = neuronal modules, green dots = oligodendrocyte modules, red dots =  
947 astrocyte modules, purple dots = microglia modules, yellow dots = endothelial modules. (e)  
948 Significance of enrichment of LOAD candidate risk genes within each module. Grey bars =  
949 modules with no cell type enrichment, blue bars = neuronal modules, purple bars = microglia  
950 modules. Bars extending above the line represent  $FDR < 0.05$ . (f-g) Expression of the module  
951 eigengene decreases significantly with increased dementia severity for both the  
952 neuronal/synapse module M2 (f) and the mitochondrial/metabolism module M16 (g). Pearson's  
953 correlation and FDR-corrected  $P$ -value are indicated. Differences in the expression of the  
954 module eigengene at each CDR score with respect to cognitive baseline (CDR=0) was also  
955 assessed by t test. (h) Gene expression correlation with CDR is significantly correlated with  
956 network connectivity as measured by kME. Pearson's correlation and FDR-corrected  $P$ -value  
957 are indicated. Core network candidate risk genes, according to max kME, are shown in teal. The  
958 top 20 high-priority risk gene candidates, as determined by correlation with CDR and network  
959 centrality, are highlighted in orange. (i-k) Significantly enriched ( $FDR < 0.05$ ) Gene Ontology  
960 biological process terms are shown as network maps, with edges connecting overlapping gene

961 sets, for the neuronal/synapse module M2 (i), the mitochondrial/metabolism module M16 (j),  
962 and the core network genes (k). Node size indicates the number of genes overlapping with the  
963 term and node color indicates magnitude of adjusted  $P$ -value significance.  $*P < 0.05$ ,  $**P < 0.01$ ,  
964  $***P < 0.001$ .

965

966 **Figure 4. Neuronal knockdown of LOAD risk gene orthologs alters memory function in *C.***  
967 ***elegans***

968 (a-g) 1 hour and 2 hour post-conditioning learning indices of worms treated with whole-life RNAi  
969 for LOAD candidate risk gene orthologs. Grouping of the tested orthologs was random and does  
970 not represent candidate prioritization.  $n \geq 4$  ( $n$ : technical replicates). Statistical significance  
971 determined by One-way ANOVA, with Dunnett's post hoc test.  $*P < 0.05$ ,  $**P < 0.01$ ,  $***P <$   
972  $0.001$ ,  $****P < 0.0001$ .

973

974 **Supplemental Figure 1. Lack of enrichment of LOAD GWAS SNPs in open chromatin of**  
975 **lung cell types**

976 (a) Enrichment signal for LOAD GWAS SNPs in open chromatin of lung cell types, both with the  
977 inclusion of GWS loci and following the removal of GWS loci and nearby SNPs ( $\pm 1$  Mb). Each  
978 point on the curves represents the difference in fold of the proportion of SNPs with a  $p$ -value  
979 below the cutoff in the ATAC-seq peaks versus all SNPs present in the GWAS summary  
980 statistics.

981

982 **Supplemental Figure 2. More candidate risk genes were mapped by variant-promoter**  
983 **chromatin interactions than by eQTL evidence**

984 (a) UpSet plot of the intersections between gene sets nominated by the chromatin interaction  
985 data from various Hi-C analyses of brain and neural tissue. (b) UpSet plot of the interactions  
986 between gene sets nominated by the large-scale brain expression quantitative trait loci (eQTL)  
987 studies.

988

989 **Supplemental Figure 3. Naive chemotaxis is mostly unaffected after neuronal knockdown**  
990 **of LOAD risk gene orthologs in *C. elegans***

991 (a-g) Naive chemotaxis indices of worms treated with whole-life RNAi for LOAD candidate risk  
992 gene orthologs. Grouping of the tested orthologs was random and does not represent candidate  
993 prioritization.  $n \geq 4$  (n: technical replicates). Statistical significance determined by One-way  
994 ANOVA, with Dunnett's post hoc test. \* $P < 0.05$ , \*\* $P < 0.01$ , \*\*\* $P < 0.001$ , \*\*\*\* $P < 0.0001$ .

**Fig. 1**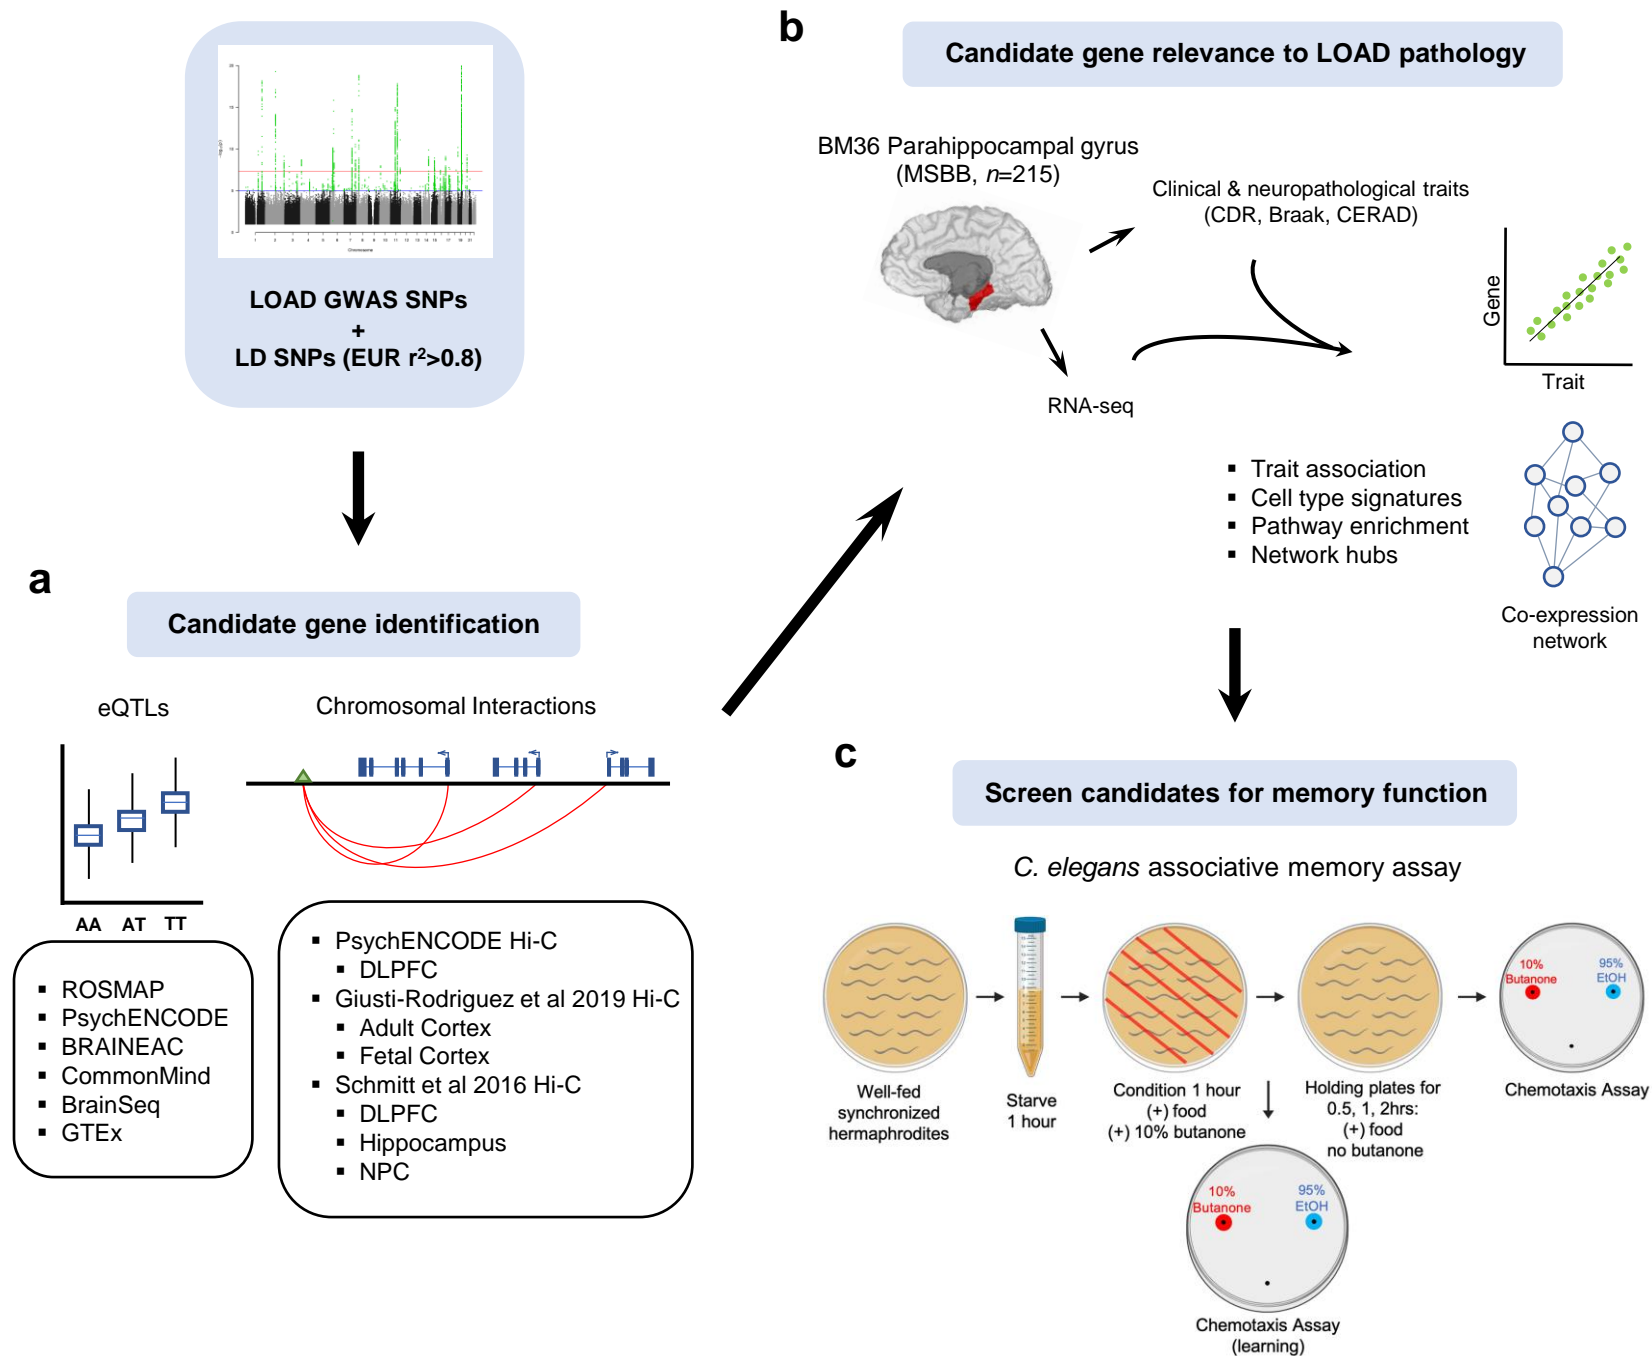

# Fig. 2

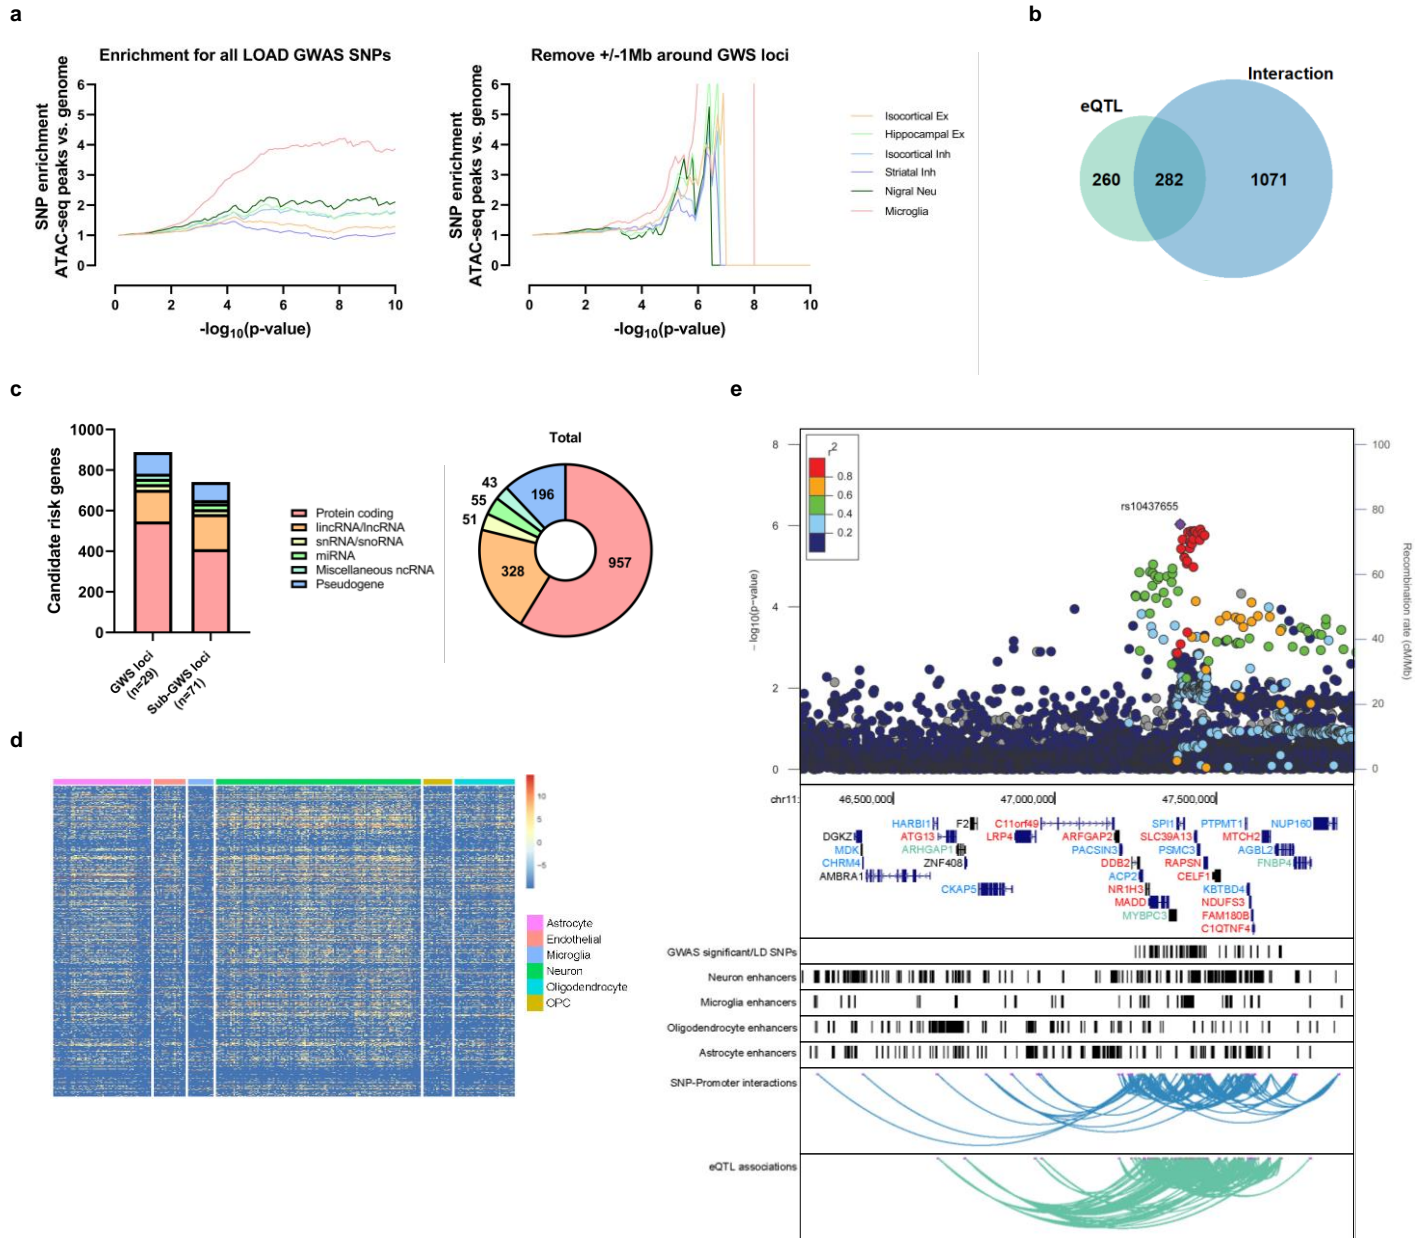

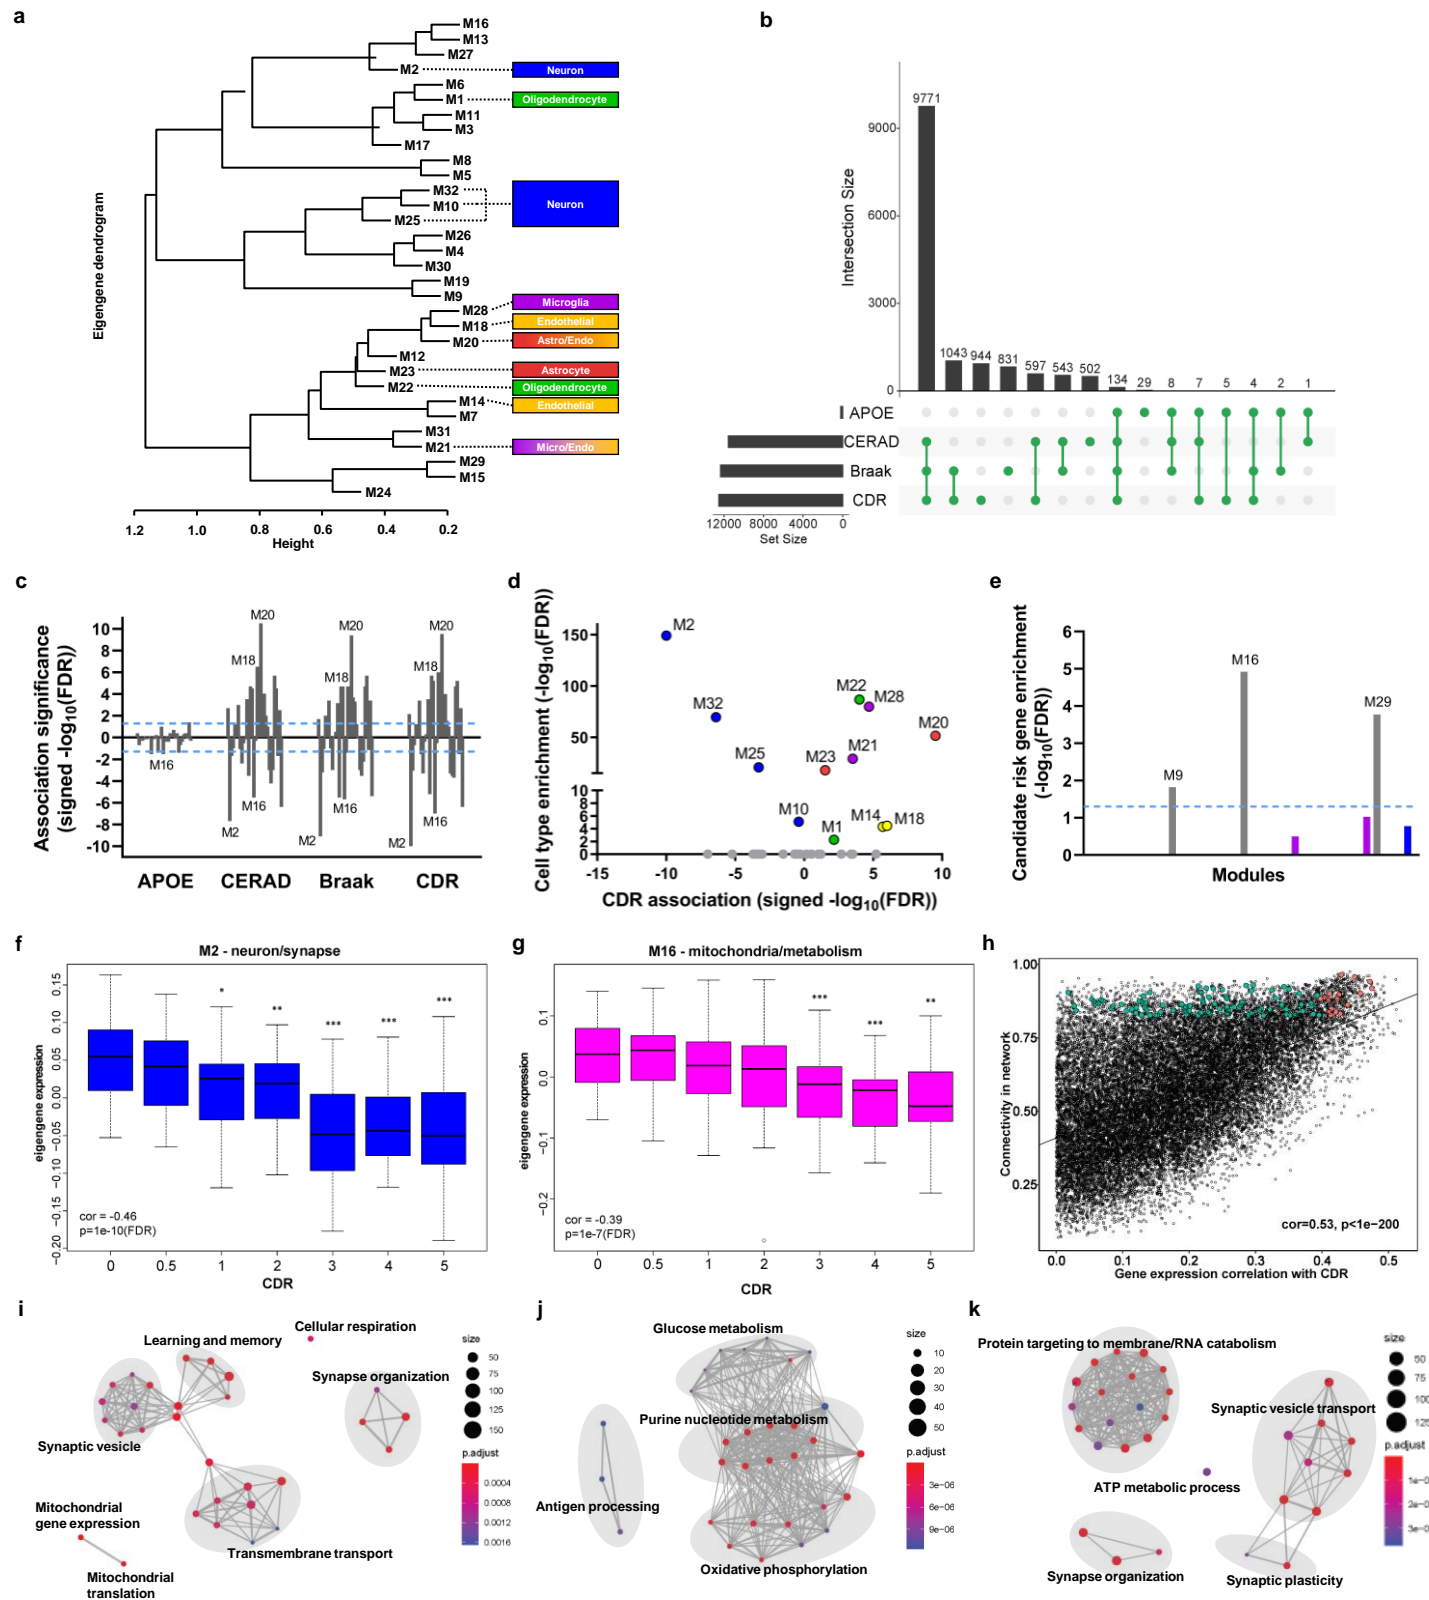

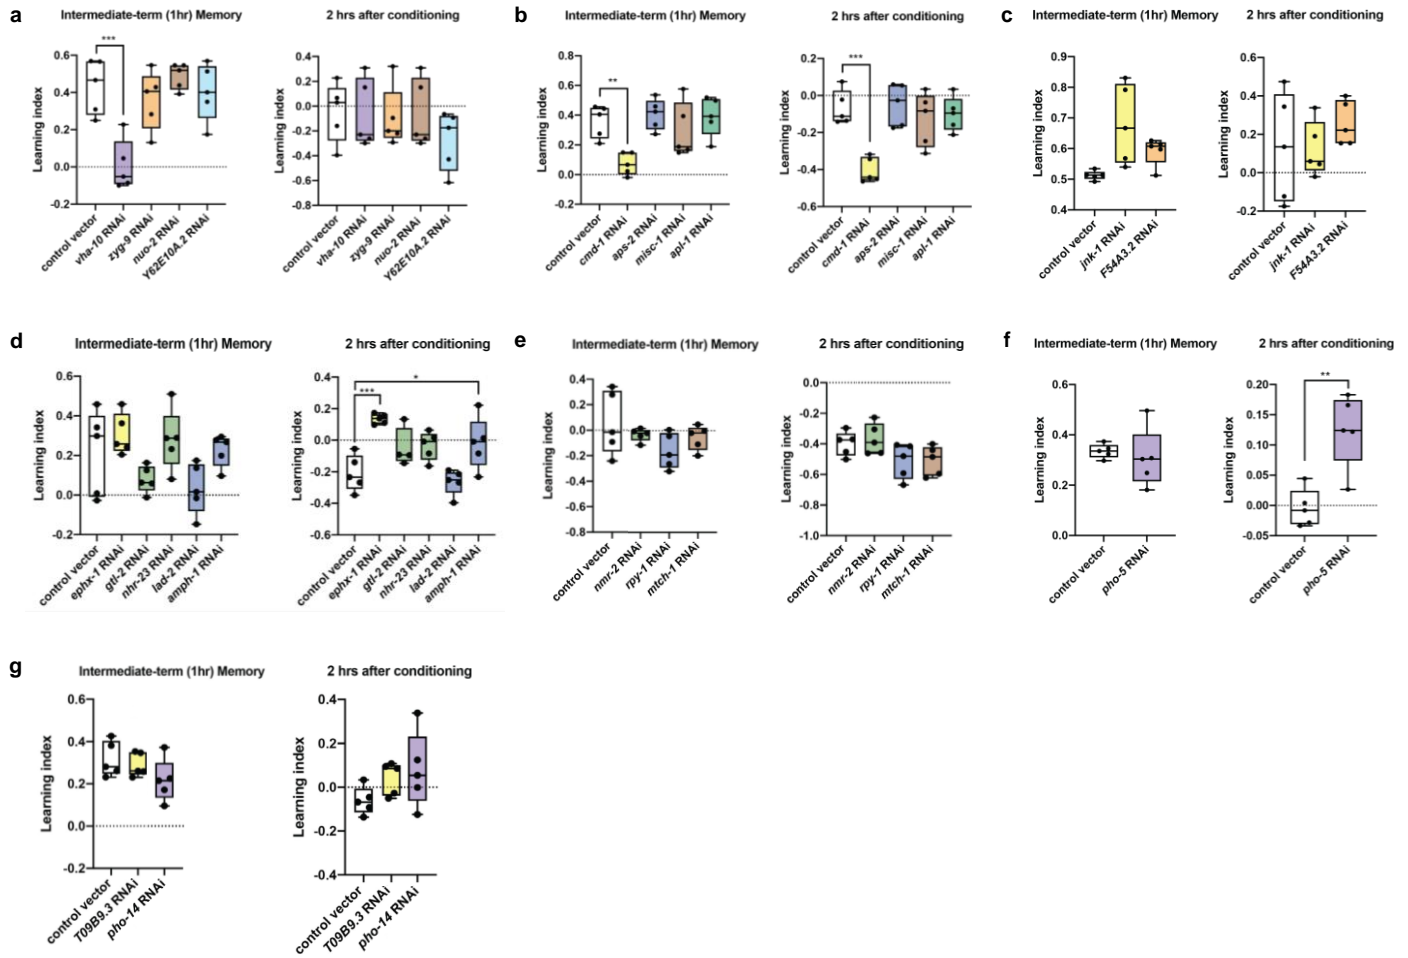

Source: http://biorxiv.org/content/10.1101/2022.08.19.504537v1.full.pdf
